# Supplementary material for: Transcriptomics reveals the effects of NTRK1 on endoplasmic reticulum stress response-associated genes in human neuronal cell lines
Source: PeerJ. 2023 Apr 12;11:e15219. doi: 10.7717/peerj.15219 (PMC10105561; doi:10.7717/peerj.15219)
Supplement: Supplemental Information 4 [file peerj-11-15219-s004.xlsx]

## Sheet: NTRK1_vs_NC_Sig_DEG
Information of DEGs (differently expressed genes) between NTRK1-OE and NC samples of SH-SY5Y cells
Gene	baseMean	log2FoldChange	lfcSE	stat	pvalue	padj	NC_1	NC_2	NC_3	NTRK1_1	NTRK1_2	NTRK1_3	Symbol	Chr	GeneType	Description
ENSG00000136010.14	256.698	0.845209	0.189829	4.45249	8.49e-06	0.000558125	0.7	0.6	0.57	1.34	0.78	1.11	ALDH1L2	chr12	protein_coding	aldehyde dehydrogenase 1 family member L2
ENSG00000175197.13	1882.49	0.986336	0.116182	8.48958	2.07e-17	1.23e-14	31.62	29.29	32.25	54.65	65.98	56.83	DDIT3	chr12	protein_coding	DNA damage inducible transcript 3
ENSG00000136235.17	73.8259	-1.70093	0.286903	-5.92857	3.06e-09	6.13e-07	0.65	0.61	0.59	0.26	0.16	0.12	GPNMB	chr7	protein_coding	glycoprotein nmb
ENSG00000144730.19	814.455	-0.597036	0.140415	-4.25194	2.12e-05	0.00120298	3.64	3.13	3.14	2.35	1.64	2.31	IL17RD	chr3	protein_coding	interleukin 17 receptor D
ENSG00000153993.14	17.0176	-1.76868	0.537122	-3.29289	0.000991645	0.0224242	0.1	0.1	0.11	0.04	0.02	0.04	SEMA3D	chr7	protein_coding	semaphorin 3D
ENSG00000140105.18	2097.24	0.746912	0.106104	7.03941	1.93e-12	6.35e-10	7.44	8.3	7.98	12.61	12.78	12.98	WARS1	chr14	protein_coding	tryptophanyl-tRNA synthetase 1
ENSG00000286342.1	138.481	0.64115	0.217507	2.94772	0.0032013	0.0493861	1.31	2.17	1.77	2.65	2.64	2.67	RP11-460N20.8	chr7	lncRNA	--
ENSG00000154736.6	27.2982	-1.72002	0.441429	-3.89647	9.76e-05	0.00401113	0.15	0.11	0.16	0.03	0.04	0.06	ADAMTS5	chr21	protein_coding	ADAM metallopeptidase with thrombospondin type 1 motif 5
ENSG00000113369.9	350.029	-0.742973	0.177577	-4.18396	2.86e-05	0.00153704	3.67	2.51	2.35	1.96	1.46	1.45	ARRDC3	chr5	protein_coding	arrestin domain containing 3
ENSG00000179284.6	338.527	0.974388	0.167492	5.81751	5.97e-09	1.09e-06	2.93	4.08	4.12	7.27	6.59	7.33	DAND5	chr19	protein_coding	DAN domain BMP antagonist family member 5
ENSG00000242265.6	2267.85	-0.685281	0.118364	-5.78962	7.05e-09	1.27e-06	15.56	12.65	12.23	9.04	7.08	8.02	PEG10	chr7	protein_coding	paternally expressed 10
ENSG00000198795.11	213.068	-0.750541	0.180901	-4.14891	3.34e-05	0.00176778	1.59	1.37	1.19	0.91	0.64	0.82	ZNF521	chr18	protein_coding	zinc finger protein 521
ENSG00000166598.16	38765.8	1.09082	0.127641	8.54596	1.27e-17	8.56e-15	76.02	57.83	49.58	131.46	128.97	113.44	HSP90B1	chr12	protein_coding	heat shock protein 90 beta family member 1
ENSG00000162951.11	13.3862	-2.28664	0.648649	-3.52524	0.000423096	0.0124193	0.11	0.13	0.18	0.04	0.02	0.02	LRRTM1	chr2	protein_coding	leucine rich repeat transmembrane neuronal 1
ENSG00000113504.21	251.421	0.735833	0.155463	4.73316	2.21e-06	0.000190817	1	1.03	1	1.65	1.51	1.7	SLC12A7	chr5	protein_coding	solute carrier family 12 member 7
ENSG00000163661.4	56.702	1.15776	0.319663	3.6218	0.000292559	0.00949712	0.76	0.46	0.59	1.35	1.62	0.87	PTX3	chr3	protein_coding	pentraxin 3
ENSG00000172201.12	73.4883	-0.984605	0.260598	-3.77825	0.000157934	0.00582433	0.92	0.82	0.71	0.38	0.46	0.34	ID4	chr6	protein_coding	inhibitor of DNA binding 4, HLH protein
ENSG00000260230.5	242.834	-0.775867	0.169715	-4.57159	4.84e-06	0.000364685	0.71	0.56	0.64	0.38	0.3	0.39	FRRS1L	chr9	protein_coding	ferric chelate reductase 1 like
ENSG00000129173.13	99.9775	-0.779237	0.223954	-3.47945	0.000502444	0.0139784	1.1	0.85	1	0.56	0.53	0.57	E2F8	chr11	protein_coding	E2F transcription factor 8
ENSG00000179292.5	299.011	0.63398	0.166013	3.81885	0.000134076	0.00512807	2.43	3.27	3.16	4.21	4.59	4.5	TMEM151A	chr11	protein_coding	transmembrane protein 151A
ENSG00000196139.14	14.7887	-1.76516	0.583487	-3.02519	0.00248476	0.0420558	0.23	0.16	0.18	0.02	0.06	0.08	AKR1C3	chr10	protein_coding	aldo-keto reductase family 1 member C3
ENSG00000152377.14	365.941	-0.653862	0.1497	-4.36781	1.26e-05	0.000772605	2.61	2.3	2.08	1.58	1.2	1.47	SPOCK1	chr5	protein_coding	SPARC (osteonectin), cwcv and kazal like domains proteoglycan 1
ENSG00000122966.17	1638.06	-0.727287	0.127691	-5.69567	1.23e-08	2e-06	2.36	2.18	2.34	1.53	1.08	1.4	CIT	chr12	protein_coding	citron rho-interacting serine/threonine kinase
ENSG00000137441.8	39.3045	-1.41213	0.371258	-3.80363	0.000142593	0.00536095	1.21	1.45	1.96	0.57	0.69	0.42	FGFBP2	chr4	protein_coding	fibroblast growth factor binding protein 2
ENSG00000162601.11	326.366	-0.6678	0.204581	-3.26422	0.00109764	0.0240579	1.36	0.9	0.71	0.73	0.48	0.57	MYSM1	chr1	protein_coding	Myb like, SWIRM and MPN domains 1
ENSG00000172260.15	53.3851	-1.24414	0.304325	-4.08819	4.35e-05	0.00220978	0.21	0.15	0.19	0.08	0.06	0.08	NEGR1	chr1	protein_coding	neuronal growth regulator 1
ENSG00000172780.17	103.529	0.690146	0.231695	2.97869	0.00289486	0.04602	0.45	0.5	0.58	0.71	0.72	0.94	RAB43	chr3	protein_coding	RAB43, member RAS oncogene family
ENSG00000152253.9	567.891	-0.654949	0.124992	-5.23994	1.61e-07	1.91e-05	13.18	11.68	11.82	8.12	7.26	7	SPC25	chr2	protein_coding	SPC25 component of NDC80 kinetochore complex
ENSG00000100908.14	1043.91	0.63938	0.135722	4.71097	2.47e-06	0.000204817	14.66	17.05	17.62	21.86	27.47	24.76	EMC9	chr14	protein_coding	ER membrane protein complex subunit 9
ENSG00000054148.18	2077.13	0.586354	0.137729	4.25731	2.07e-05	0.00118411	27.05	35.53	36.33	44.65	51.25	47.55	PHPT1	chr9	protein_coding	phosphohistidine phosphatase 1
ENSG00000111057.11	185.348	-1.11022	0.203014	-5.46871	4.53e-08	6.49e-06	2.28	2.88	2.77	1.07	1.47	1.01	KRT18	chr12	protein_coding	keratin 18
ENSG00000198695.2	13159.3	-0.961001	0.111615	-8.60996	7.31e-18	5.13e-15	1001.82	1027.05	1158.54	574.47	520.96	483.42	MT-ND6	chrM	protein_coding	mitochondrially encoded NADH:ubiquinone oxidoreductase core subunit 6
ENSG00000110195.14	24.8593	1.43259	0.426993	3.35507	0.000793445	0.0190971	0.34	0.22	0.25	0.76	0.7	0.64	FOLR1	chr11	protein_coding	folate receptor alpha
ENSG00000128510.12	17.0216	-1.83883	0.572886	-3.20976	0.00132847	0.0275537	0.27	0.19	0.19	0.02	0.06	0.1	CPA4	chr7	protein_coding	carboxypeptidase A4
ENSG00000188707.6	859.442	0.719844	0.141832	5.07533	3.87e-07	4.18e-05	3.45	4.01	4.59	6	6.11	7.06	ZBED6CL	chr7	protein_coding	ZBED6 C-terminal like
ENSG00000224090.1	282.127	0.689827	0.154177	4.47426	7.67e-06	0.000519652	3.27	3.38	3.78	5.64	5.38	5.2	AC097468.4	chr2	lncRNA	--
ENSG00000146592.17	406.586	-0.840039	0.153655	-5.46703	4.58e-08	6.49e-06	1.46	1.39	1.46	0.82	0.61	0.89	CREB5	chr7	protein_coding	cAMP responsive element binding protein 5
ENSG00000061337.15	453.069	0.617101	0.14188	4.34945	1.36e-05	0.00082701	1.8	2.05	2.17	3.17	2.74	3.02	LZTS1	chr8	protein_coding	leucine zipper tumor suppressor 1
ENSG00000196517.13	62.7172	1.17065	0.298366	3.92354	8.73e-05	0.0037041	0.2	0.26	0.24	0.38	0.65	0.51	SLC6A9	chr1	protein_coding	solute carrier family 6 member 9
ENSG00000172216.6	621.346	1.24392	0.150284	8.2771	1.26e-16	7.22e-14	5.25	7.03	6.97	13.54	15.63	14.91	CEBPB	chr20	protein_coding	CCAAT enhancer binding protein beta
ENSG00000182310.15	187.196	-0.680668	0.177553	-3.8336	0.000126283	0.00492759	1.79	1.9	1.72	1.11	0.94	1.2	SPACA6	chr19	protein_coding	sperm acrosome associated 6
ENSG00000178381.12	310.458	0.686462	0.151005	4.54595	5.47e-06	0.000395199	3.32	3.59	3.14	4.88	5.66	5.02	ZFAND2A	chr7	protein_coding	zinc finger AN1-type containing 2A
ENSG00000166923.12	36.8894	-2.17217	0.392898	-5.52858	3.23e-08	4.84e-06	0.17	0.12	0.1	0.03	0.02	0.03	GREM1	chr15	protein_coding	gremlin 1, DAN family BMP antagonist
ENSG00000040608.14	50.3637	0.920738	0.299915	3.07	0.00214062	0.0385962	0.38	0.34	0.35	0.63	0.74	0.59	RTN4R	chr22	protein_coding	reticulon 4 receptor
ENSG00000070669.17	2242.24	0.812802	0.099721	8.15076	3.62e-16	2e-13	11.14	10.57	10.35	17.21	18.85	18.07	ASNS	chr7	protein_coding	asparagine synthetase (glutamine-hydrolyzing)
ENSG00000135750.15	162.68	-0.884978	0.192024	-4.60869	4.05e-06	0.000313069	2.03	1.73	2.01	0.87	1.14	1	KCNK1	chr1	protein_coding	potassium two pore domain channel subfamily K member 1
ENSG00000165323.16	84.6081	-1.27724	0.287377	-4.44446	8.81e-06	0.000575013	0.22	0.19	0.18	0.11	0.04	0.09	FAT3	chr11	protein_coding	FAT atypical cadherin 3
ENSG00000143870.13	13601.7	0.668933	0.0896455	7.46198	8.52e-14	3.21e-11	84.8	83.37	79.22	127.11	129.53	121.56	PDIA6	chr2	protein_coding	protein disulfide isomerase family A member 6
ENSG00000110427.17	399.071	-0.637244	0.151385	-4.20943	2.56e-05	0.0014028	1.08	1.13	1.26	0.83	0.64	0.68	KIAA1549L	chr11	protein_coding	KIAA1549 like
ENSG00000176092.17	265.291	0.591911	0.162089	3.65177	0.000260438	0.00865437	0.89	0.98	1.08	1.36	1.38	1.55	CRYBG2	chr1	protein_coding	crystallin beta-gamma domain containing 2
ENSG00000129990.15	2118.98	0.632066	0.121371	5.20772	1.91e-07	2.17e-05	9.27	10.52	10.95	14.01	16.41	15.54	SYT5	chr19	protein_coding	synaptotagmin 5
ENSG00000071575.12	332.438	-0.66956	0.145231	-4.61032	4.02e-06	0.000312188	2.86	2.85	2.91	1.92	1.58	1.71	TRIB2	chr2	protein_coding	tribbles pseudokinase 2
ENSG00000167244.21	23815.6	0.735303	0.105818	6.94875	3.69e-12	1.16e-09	97.8	81.12	96.61	156.53	134.47	150.32	IGF2	chr11	protein_coding	insulin like growth factor 2
ENSG00000150471.17	42.9903	-1.28017	0.360493	-3.55116	0.000383536	0.0115076	0.15	0.09	0.15	0.05	0.07	0.04	ADGRL3	chr4	protein_coding	adhesion G protein-coupled receptor L3
ENSG00000138658.16	184.816	-0.763297	0.224713	-3.39677	0.000681868	0.0171302	1.16	0.79	0.54	0.48	0.47	0.45	ZGRF1	chr4	protein_coding	zinc finger GRF-type containing 1
ENSG00000049323.16	55.9229	-1.09787	0.317829	-3.45429	0.000551749	0.0149049	0.27	0.34	0.38	0.13	0.21	0.12	LTBP1	chr2	protein_coding	latent transforming growth factor beta binding protein 1
ENSG00000129757.15	182.86	0.872489	0.185082	4.71406	2.43e-06	0.000203114	1.5	1.74	1.77	2.78	2.72	3.36	CDKN1C	chr11	protein_coding	cyclin dependent kinase inhibitor 1C
ENSG00000054654.19	2776.6	-0.588356	0.145782	-4.03586	5.44e-05	0.00261118	4.12	3.32	2.55	2.33	1.77	2.26	SYNE2	chr14	protein_coding	spectrin repeat containing nuclear envelope protein 2
ENSG00000249509.1	59.7095	0.906653	0.288727	3.14018	0.00168845	0.032991	1.22	1.26	1.71	2.37	2.87	2.35	NEUROG2-AS1	chr4	lncRNA	NEUROG2 and ZGRF1 antisense RNA 1
ENSG00000129810.15	284.387	-0.732564	0.150428	-4.86988	1.12e-06	0.000105212	3.32	2.95	2.9	1.84	1.83	1.63	SGO1	chr3	protein_coding	shugoshin 1
ENSG00000127399.15	219.498	0.663661	0.199308	3.32982	0.00086903	0.0204077	2.04	3.31	2.91	3.75	4.56	4.38	LRRC61	chr7	protein_coding	leucine rich repeat containing 61
ENSG00000124942.14	2242.24	-0.757841	0.140577	-5.39093	7.01e-08	9.18e-06	4.88	4.53	4.56	2.94	1.97	3.05	AHNAK	chr11	protein_coding	AHNAK nucleoprotein
ENSG00000121690.11	71.7984	-0.963285	0.288415	-3.33993	0.00083799	0.0197991	1.19	0.93	0.66	0.44	0.57	0.36	DEPDC7	chr11	protein_coding	DEP domain containing 7
ENSG00000136492.10	203.157	-0.608632	0.192805	-3.15672	0.00159556	0.0315679	0.49	0.41	0.32	0.3	0.21	0.25	BRIP1	chr17	protein_coding	BRCA1 interacting helicase 1
ENSG00000152104.12	93.6463	-1.33395	0.232258	-5.74342	9.28e-09	1.54e-06	0.24	0.23	0.22	0.08	0.09	0.09	PTPN14	chr1	protein_coding	protein tyrosine phosphatase non-receptor type 14
ENSG00000168071.22	118.067	1.0854	0.220755	4.91675	8.8e-07	8.61e-05	0.29	0.3	0.28	0.52	0.72	0.54	CCDC88B	chr11	protein_coding	coiled-coil domain containing 88B
ENSG00000168003.18	3601.21	0.683986	0.111947	6.10993	9.97e-10	2.3e-07	12.42	14.89	14.26	21.32	21.39	21.72	SLC3A2	chr11	protein_coding	solute carrier family 3 member 2
ENSG00000250979.1	217.365	-0.903333	0.198659	-4.54716	5.44e-06	0.000395199	3.87	2.71	2.44	1.88	1.28	1.45	RP11-656G20.1	chr8	unprocessed_pseudogene	--
ENSG00000166387.14	262.71	-0.956444	0.156972	-6.09308	1.11e-09	2.52e-07	1.24	1.09	1.1	0.61	0.5	0.58	PPFIBP2	chr11	protein_coding	PPFIA binding protein 2
ENSG00000171488.15	139.138	-0.694188	0.203468	-3.41178	0.000645399	0.0165111	0.57	0.44	0.41	0.3	0.24	0.3	LRRC8C	chr1	protein_coding	leucine rich repeat containing 8 VRAC subunit C
ENSG00000162745.11	74.9649	-1.61171	0.272956	-5.90466	3.53e-09	7e-07	0.91	1.1	1.15	0.32	0.39	0.29	OLFML2B	chr1	protein_coding	olfactomedin like 2B
ENSG00000260136.6	20.28	1.48561	0.492504	3.01645	0.00255758	0.0427702	0.2	0.51	0.29	0.8	1.01	0.95	CTD-2270L9.4	chr16	lncRNA	--
ENSG00000275832.5	1686.13	0.626089	0.132421	4.72802	2.27e-06	0.000193205	4.96	5.05	5.78	7.79	6.66	9.07	ARHGAP23	chr17	protein_coding	Rho GTPase activating protein 23
ENSG00000110619.18	6978.47	0.765328	0.0967755	7.90828	2.61e-15	1.26e-12	16.52	16.64	16.49	25.96	28.64	26.59	CARS1	chr11	protein_coding	cysteinyl-tRNA synthetase 1
ENSG00000143476.18	343.178	-0.614162	0.145061	-4.23383	2.3e-05	0.00127917	3.02	2.51	2.62	1.86	1.55	1.7	DTL	chr1	protein_coding	denticleless E3 ubiquitin protein ligase homolog
ENSG00000167767.14	56.8203	1.27119	0.286528	4.43651	9.14e-06	0.00059111	0.27	0.23	0.25	0.55	0.61	0.54	KRT80	chr12	protein_coding	keratin 80
ENSG00000173068.18	135.525	-0.90804	0.233479	-3.88917	0.000100587	0.00409019	0.45	0.31	0.36	0.21	0.13	0.23	BNC2	chr9	protein_coding	basonuclin 2
ENSG00000136205.17	263.145	-0.707691	0.16169	-4.37685	1.2e-05	0.000750208	0.85	0.92	0.9	0.51	0.47	0.6	TNS3	chr7	protein_coding	tensin 3
ENSG00000223812.8	212.46	0.765294	0.168699	4.53645	5.72e-06	0.000409262	0.61	0.53	0.45	0.89	0.83	0.86	RP11-197K6.1	chr3	lncRNA	--
ENSG00000109339.24	198.432	-0.625634	0.168194	-3.71973	0.000199439	0.00693679	0.2	0.17	0.17	0.11	0.11	0.12	MAPK10	chr4	protein_coding	mitogen-activated protein kinase 10
ENSG00000189056.15	87.7276	-0.928707	0.258974	-3.58611	0.000335649	0.0104777	0.09	0.11	0.11	0.05	0.04	0.07	RELN	chr7	protein_coding	reelin
ENSG00000089041.17	290.679	-0.635399	0.178833	-3.55303	0.000380822	0.0114484	2.4	1.89	1.88	1.45	0.93	1.43	P2RX7	chr12	protein_coding	purinergic receptor P2X 7
ENSG00000156687.11	245.811	-0.798682	0.174102	-4.58744	4.49e-06	0.000339874	0.96	0.91	0.91	0.61	0.4	0.54	UNC5D	chr8	protein_coding	unc-5 netrin receptor D
ENSG00000244405.8	589.754	-0.638438	0.147688	-4.32289	1.54e-05	0.000920735	3.49	4.34	4.13	2.54	2.11	2.77	ETV5	chr3	protein_coding	ETS variant transcription factor 5
ENSG00000196584.3	623.445	-0.969634	0.168812	-5.74388	9.25e-09	1.54e-06	7.07	5.23	4.27	3.25	2.26	2.59	XRCC2	chr7	protein_coding	X-ray repair cross complementing 2
ENSG00000176720.6	406.103	0.594554	0.154167	3.85656	0.000114992	0.00460326	3.54	4.33	3.75	4.87	6.15	5.89	BOK	chr2	protein_coding	BCL2 family apoptosis regulator BOK
ENSG00000171848.16	1390.91	-0.58808	0.101912	-5.77047	7.91e-09	1.37e-06	6.05	5.86	5.7	3.87	3.58	3.83	RRM2	chr2	protein_coding	ribonucleotide reductase regulatory subunit M2
ENSG00000036565.15	184.262	0.772073	0.181349	4.25738	2.07e-05	0.00118411	1.11	1	1.24	1.87	1.97	1.67	SLC18A1	chr8	protein_coding	solute carrier family 18 member A1
ENSG00000154229.12	7031.75	-0.647346	0.119362	-5.42336	5.85e-08	8.07e-06	24.81	24.66	24.58	16.46	12.32	16.77	PRKCA	chr17	protein_coding	protein kinase C alpha
ENSG00000051108.15	1353.08	1.02156	0.112192	9.10551	8.59e-20	8.84e-17	5.59	5.6	5.81	10.39	11.84	10.98	HERPUD1	chr16	protein_coding	homocysteine inducible ER protein with ubiquitin like domain 1
ENSG00000233264.2	45.7562	-1.38781	0.339768	-4.0846	4.42e-05	0.00222236	1.83	1.37	1.17	0.68	0.38	0.54	AC006042.8	chr7	processed_pseudogene	--
ENSG00000026508.20	110.981	-0.95212	0.224203	-4.2467	2.17e-05	0.00121899	0.45	0.52	0.44	0.25	0.26	0.19	CD44	chr11	protein_coding	CD44 molecule (Indian blood group)
ENSG00000072682.20	813.082	0.631719	0.130444	4.84284	1.28e-06	0.000117032	1.8	2.02	2.23	2.89	3.12	3.04	P4HA2	chr5	protein_coding	prolyl 4-hydroxylase subunit alpha 2
ENSG00000185624.16	14180.5	0.647655	0.106955	6.05537	1.4e-09	3.14e-07	29.45	33.29	32.81	45.46	50.53	48.21	P4HB	chr17	protein_coding	prolyl 4-hydroxylase subunit beta
ENSG00000140279.13	29.5114	1.62794	0.406058	4.00914	6.09e-05	0.00284045	0.04	0.06	0.05	0.15	0.13	0.16	DUOX2	chr15	protein_coding	dual oxidase 2
ENSG00000102580.15	267.625	1.15966	0.174602	6.6417	3.1e-11	8.56e-09	1.21	0.89	0.77	2.21	1.78	2.15	DNAJC3	chr13	protein_coding	DnaJ heat shock protein family (Hsp40) member C3
ENSG00000149428.19	30436.6	1.32605	0.105291	12.5941	2.27e-36	4.39e-33	66.07	74.09	76.09	173.39	167.91	181.51	HYOU1	chr11	protein_coding	hypoxia up-regulated 1
ENSG00000275457.1	162.356	0.599357	0.19833	3.02202	0.00251094	0.042357	5.11	3.64	4.09	5.19	6.85	6.55	RP1-198K11.5	chr20	lncRNA	--
ENSG00000137877.10	42.8113	1.11373	0.339911	3.27654	0.00105087	0.0234314	0.1	0.05	0.07	0.15	0.14	0.16	SPTBN5	chr15	protein_coding	spectrin beta, non-erythrocytic 5
ENSG00000253230.9	187.648	-1.04657	0.175824	-5.95234	2.64e-09	5.44e-07	1.65	1.44	1.49	0.77	0.63	0.72	MIR124-1HG	chr8	lncRNA	MIR124-1 host gene
ENSG00000164708.6	184.452	0.946842	0.178105	5.31621	1.06e-07	1.34e-05	4.48	5.35	4.65	8.62	9.23	9.08	PGAM2	chr7	protein_coding	phosphoglycerate mutase 2
ENSG00000167004.13	7647.32	0.83395	0.0976805	8.53753	1.37e-17	8.83e-15	43.99	41.67	40.02	71.35	76.98	66.93	PDIA3	chr15	protein_coding	protein disulfide isomerase family A member 3
ENSG00000143494.16	159.571	-0.673691	0.202913	-3.3201	0.000899841	0.0208667	0.83	0.69	0.58	0.51	0.37	0.37	VASH2	chr1	protein_coding	vasohibin 2
ENSG00000184588.18	278.408	-0.910042	0.165873	-5.48638	4.1e-08	5.98e-06	1.55	1.26	1.14	0.75	0.57	0.69	PDE4B	chr1	protein_coding	phosphodiesterase 4B
ENSG00000132821.12	1369.28	0.718903	0.132725	5.41647	6.08e-08	8.31e-06	15.77	16.83	18.41	22.93	28.69	29.28	VSTM2L	chr20	protein_coding	V-set and transmembrane domain containing 2 like
ENSG00000115902.11	504.833	0.664244	0.130556	5.0878	3.62e-07	3.94e-05	1.69	1.93	1.8	2.75	2.69	2.84	SLC1A4	chr2	protein_coding	solute carrier family 1 member 4
ENSG00000070540.13	254.8	0.633525	0.162172	3.9065	9.36e-05	0.00388902	1.93	1.66	2.07	2.77	2.64	3.04	WIPI1	chr17	protein_coding	WD repeat domain, phosphoinositide interacting 1
ENSG00000084636.18	625.532	0.714341	0.124049	5.75855	8.48e-09	1.44e-06	1.58	1.66	1.69	2.47	2.62	2.7	COL16A1	chr1	protein_coding	collagen type XVI alpha 1 chain
ENSG00000247627.2	954.464	-0.679781	0.129188	-5.26196	1.43e-07	1.75e-05	24.54	29.72	27.85	18.19	15.64	15.63	MTND4P12	chr5	processed_pseudogene	MT-ND4 pseudogene 12
ENSG00000128228.5	1352.74	1.41795	0.129884	10.917	9.56e-28	1.34e-24	20.61	21.93	24.38	51.08	63.42	57.83	SDF2L1	chr22	protein_coding	stromal cell derived factor 2 like 1
ENSG00000146242.9	114.364	-0.694796	0.212994	-3.26205	0.00110611	0.0242091	1.41	1.29	1.23	0.8	0.87	0.66	TPBG	chr6	protein_coding	trophoblast glycoprotein
ENSG00000178403.4	2904.57	1.2441	0.110703	11.2381	2.65e-29	4.09e-26	24.94	22.01	25.5	50.82	54.86	59.39	NEUROG2	chr4	protein_coding	neurogenin 2
ENSG00000112319.20	51.4254	-1.05353	0.310847	-3.38922	0.000700913	0.0173566	0.2	0.14	0.12	0.08	0.06	0.07	EYA4	chr6	protein_coding	EYA transcriptional coactivator and phosphatase 4
ENSG00000069535.14	98.1663	-0.683082	0.232006	-2.94424	0.00323748	0.0496778	1.15	1.4	1.45	0.73	0.86	0.82	MAOB	chrX	protein_coding	monoamine oxidase B
ENSG00000173641.18	56.6912	1.41382	0.34603	4.08583	4.39e-05	0.00221777	0.28	0.45	0.2	0.6	0.71	1.09	HSPB7	chr1	protein_coding	heat shock protein family B (small) member 7
ENSG00000188573.8	616.669	0.599981	0.168203	3.56701	0.000361081	0.0110007	10.1	13.17	12.14	13.24	19.36	19.18	FBLL1	chr5	protein_coding	fibrillarin like 1
ENSG00000115107.20	796.623	1.02577	0.131637	7.79243	6.57e-15	2.82e-12	3.73	3.24	4.11	6.83	7.05	7.85	STEAP3	chr2	protein_coding	STEAP3 metalloreductase
ENSG00000198570.7	192.157	0.631992	0.174742	3.61672	0.000298362	0.00962482	1.41	1.39	1.34	1.86	2	2.32	RD3	chr1	protein_coding	RD3 regulator of GUCY2D
ENSG00000119699.8	31.333	-1.87574	0.405945	-4.62068	3.82e-06	0.000301535	0.35	0.29	0.27	0.06	0.09	0.09	TGFB3	chr14	protein_coding	transforming growth factor beta 3
ENSG00000125775.15	165.677	0.683392	0.186368	3.66689	0.000245514	0.00824714	1.43	1.59	1.76	2.37	2.5	2.55	SDCBP2	chr20	protein_coding	syndecan binding protein 2
ENSG00000167797.8	949.92	0.953979	0.134045	7.11687	1.1e-12	3.88e-10	9.22	10.7	10.88	17	20.92	19.62	CDK2AP2	chr11	protein_coding	cyclin dependent kinase 2 associated protein 2
ENSG00000286743.1	23.5994	1.48048	0.468216	3.16196	0.00156714	0.0311857	0.23	0.19	0.13	0.68	0.5	0.3	RP1-77H15.2	chr17	lncRNA	--
ENSG00000077238.14	45.6349	-1.51888	0.344336	-4.41105	1.03e-05	0.000656841	0.31	0.36	0.43	0.11	0.16	0.1	IL4R	chr16	protein_coding	interleukin 4 receptor
ENSG00000197928.11	295.676	-0.617315	0.161008	-3.83406	0.000126046	0.00492759	1.4	1.14	1.17	0.9	0.65	0.77	ZNF677	chr19	protein_coding	zinc finger protein 677
ENSG00000232931.6	342.319	-0.617879	0.176973	-3.49137	0.000480544	0.0135007	1.95	1.52	1.2	1.12	0.98	0.82	LINC00342	chr2	lncRNA	long intergenic non-protein coding RNA 342
ENSG00000124302.13	86.528	0.759664	0.238025	3.19153	0.00141521	0.0290023	0.66	0.63	0.74	1.13	1.18	0.99	CHST8	chr19	protein_coding	carbohydrate sulfotransferase 8
ENSG00000166016.6	201.279	1.18528	0.207766	5.70491	1.16e-08	1.91e-06	0.75	0.7	0.93	1.93	1.27	2.02	ABTB2	chr11	protein_coding	ankyrin repeat and BTB domain containing 2
ENSG00000145050.19	4556.12	1.15063	0.106623	10.7916	3.77e-27	4.86e-24	40.71	43.77	42.94	93.74	95.98	82.73	MANF	chr3	protein_coding	mesencephalic astrocyte derived neurotrophic factor
ENSG00000116661.11	840.365	0.739775	0.131522	5.6247	1.86e-08	2.99e-06	5.76	6.44	6.93	9.45	10.95	10.43	FBXO2	chr1	protein_coding	F-box protein 2
ENSG00000166922.8	212.825	0.850183	0.170955	4.97315	6.59e-07	6.74e-05	2.14	2.39	2.13	3.52	4.19	3.85	SCG5	chr15	protein_coding	secretogranin V
ENSG00000167476.10	1690.05	0.601316	0.151378	3.97227	7.12e-05	0.00316105	18.36	22.29	25.46	26.98	35.94	33.9	JSRP1	chr19	protein_coding	junctional sarcoplasmic reticulum protein 1
ENSG00000185532.20	51.5985	-1.21676	0.311221	-3.90965	9.24e-05	0.00388902	0.22	0.14	0.18	0.07	0.08	0.07	PRKG1	chr10	protein_coding	protein kinase cGMP-dependent 1
ENSG00000131187.10	328.409	0.659422	0.161619	4.08009	4.5e-05	0.00223669	2.66	2.77	3.45	4.52	4.11	4.92	F12	chr5	protein_coding	coagulation factor XII
ENSG00000168386.19	186.963	-1.57655	0.210405	-7.49296	6.73e-14	2.67e-11	1.59	1.24	0.93	0.46	0.34	0.4	FILIP1L	chr3	protein_coding	filamin A interacting protein 1 like
ENSG00000111247.15	214.461	-0.678308	0.1689	-4.01605	5.92e-05	0.00277959	3.44	3.63	2.9	2.12	1.92	1.96	RAD51AP1	chr12	protein_coding	RAD51 associated protein 1
ENSG00000161860.8	106.263	-0.675327	0.226309	-2.98409	0.00284423	0.0456377	2.77	2.92	2.84	1.4	2.05	1.7	SYCE2	chr19	protein_coding	synaptonemal complex central element protein 2
ENSG00000154556.18	277.34	0.796814	0.164351	4.84824	1.25e-06	0.00011525	0.42	0.35	0.37	0.75	0.54	0.62	SORBS2	chr4	protein_coding	sorbin and SH3 domain containing 2
ENSG00000225968.7	32.2737	1.60452	0.395995	4.05186	5.08e-05	0.00246899	0.12	0.18	0.1	0.33	0.39	0.45	ELFN1	chr7	protein_coding	extracellular leucine rich repeat and fibronectin type III domain containing 1
ENSG00000279347.1	42.161	-1.16685	0.384341	-3.03597	0.00239762	0.0413022	1.69	0.91	0.85	0.68	0.28	0.5	RP11-85I17.2	chr8	TEC	--
ENSG00000139289.14	58.7218	1.0453	0.298168	3.50575	0.000455326	0.0130532	0.27	0.14	0.22	0.37	0.44	0.42	PHLDA1	chr12	protein_coding	pleckstrin homology like domain family A member 1
ENSG00000249592.6	135.288	0.880119	0.196109	4.48792	7.19e-06	0.000496137	0.75	0.63	0.6	1.22	1.15	1.11	RP11-440L14.1	chr4	lncRNA	--
ENSG00000180535.4	53.7975	1.02122	0.298132	3.42539	0.000613907	0.015943	0.36	0.42	0.28	0.69	0.61	0.75	BHLHA15	chr7	protein_coding	basic helix-loop-helix family member a15
ENSG00000132561.14	30.8516	-1.6088	0.435511	-3.69407	0.000220696	0.00752803	0.25	0.15	0.25	0.04	0.1	0.06	MATN2	chr8	protein_coding	matrilin 2
ENSG00000177469.13	444.732	-1.09585	0.155279	-7.05734	1.7e-12	5.7e-10	4.57	5.64	6.09	2.55	2.38	2.44	CAVIN1	chr17	protein_coding	caveolae associated protein 1
ENSG00000100604.13	227117	0.861211	0.110518	7.79252	6.57e-15	2.82e-12	1627.81	1703.35	1803.62	2726.42	3287.01	2967.21	CHGA	chr14	protein_coding	chromogranin A
ENSG00000146013.11	271.118	0.90123	0.154201	5.84452	5.08e-09	9.42e-07	2.92	3.17	3.07	5.25	5.44	5.79	GFRA3	chr5	protein_coding	GDNF family receptor alpha 3
ENSG00000185332.8	44.7829	1.12911	0.327649	3.44609	0.000568759	0.0152313	0.27	0.19	0.25	0.41	0.57	0.52	TMEM105	chr17	lncRNA	TMEM105 long non-coding RNA
ENSG00000138193.16	62.5647	-0.931322	0.281249	-3.31137	0.000928391	0.0212336	0.22	0.17	0.19	0.08	0.09	0.12	PLCE1	chr10	protein_coding	phospholipase C epsilon 1
ENSG00000148357.17	119.72	0.79499	0.217784	3.65035	0.00026188	0.00866504	0.12	0.14	0.15	0.23	0.19	0.27	HMCN2	chr9	protein_coding	hemicentin 2
ENSG00000215559.8	67.2961	-1.13227	0.283838	-3.98915	6.63e-05	0.00298732	0.7	0.59	0.56	0.31	0.18	0.32	ANKRD20A11P	chr21	transcribed_unprocessed_pseudogene	ankyrin repeat domain 20 family member A11, pseudogene
ENSG00000181378.14	28.185	1.21185	0.40602	2.9847	0.00283855	0.0456254	0.05	0.06	0.05	0.13	0.13	0.08	CFAP65	chr2	protein_coding	cilia and flagella associated protein 65
ENSG00000176349.11	32.2722	1.54666	0.41668	3.71186	0.000205746	0.00708058	0.19	0.07	0.09	0.3	0.38	0.26	AC110781.3	chr7	lncRNA	--
ENSG00000163626.17	136.902	-0.622885	0.196455	-3.17063	0.00152108	0.0306436	0.78	0.7	0.82	0.46	0.49	0.49	COX18	chr4	protein_coding	cytochrome c oxidase assembly factor COX18
ENSG00000197859.11	463.346	0.91831	0.141902	6.47143	9.71e-11	2.54e-08	1.95	2.28	2.36	3.81	4.06	4.15	ADAMTSL2	chr9	protein_coding	ADAMTS like 2
ENSG00000169908.12	34.3921	-1.60967	0.410907	-3.91737	8.95e-05	0.00378984	0.59	0.47	0.38	0.11	0.24	0.09	TM4SF1	chr3	protein_coding	transmembrane 4 L six family member 1
ENSG00000114450.11	177.147	-0.733689	0.209681	-3.49907	0.000466879	0.0132859	1.21	0.78	0.71	0.59	0.5	0.46	GNB4	chr3	protein_coding	G protein subunit beta 4
ENSG00000155858.6	113.154	-0.804584	0.241739	-3.32831	0.00087373	0.0204249	0.73	0.64	0.75	0.54	0.29	0.34	LSM11	chr5	protein_coding	LSM11, U7 small nuclear RNA associated
ENSG00000129521.15	64.1718	-0.871353	0.271359	-3.21107	0.00132242	0.0275022	0.4	0.36	0.34	0.22	0.18	0.17	EGLN3	chr14	protein_coding	egl-9 family hypoxia inducible factor 3
ENSG00000160352.16	133.969	-0.854981	0.213388	-4.00669	6.16e-05	0.00284045	0.72	0.53	0.46	0.33	0.27	0.3	ZNF714	chr19	protein_coding	zinc finger protein 714
ENSG00000184445.12	367.16	-0.682797	0.152764	-4.46961	7.84e-06	0.000528765	1.57	1.21	1.09	0.76	0.78	0.77	KNTC1	chr12	protein_coding	kinetochore associated 1
ENSG00000273230.1	235.774	0.700002	0.157539	4.44336	8.86e-06	0.000575013	1.92	1.98	1.82	2.91	3	3.05	RP11-1246C19.1	chr7	lncRNA	--
ENSG00000142188.17	295.964	0.849094	0.151752	5.59526	2.2e-08	3.51e-06	1.61	1.63	1.34	2.81	2.63	2.49	TMEM50B	chr21	protein_coding	transmembrane protein 50B
ENSG00000140538.16	37.2882	-1.44481	0.362061	-3.99051	6.59e-05	0.00297886	0.08	0.06	0.06	0.03	0.02	0.02	NTRK3	chr15	protein_coding	neurotrophic receptor tyrosine kinase 3
ENSG00000135835.12	422.648	1.20774	0.141557	8.53184	1.44e-17	8.9e-15	0.79	0.76	0.8	1.64	1.63	1.96	KIAA1614	chr1	protein_coding	KIAA1614
ENSG00000112562.19	27.7305	-1.41722	0.423298	-3.34804	0.000813859	0.0194432	0.36	0.33	0.28	0.13	0.07	0.16	SMOC2	chr6	protein_coding	SPARC related modular calcium binding 2
ENSG00000090861.17	11148.2	0.89287	0.102818	8.68402	3.82e-18	3.28e-15	22.62	25.21	25.47	43.21	43.54	44.44	AARS1	chr16	protein_coding	alanyl-tRNA synthetase 1
ENSG00000179104.9	321.849	-0.712763	0.159039	-4.48168	7.41e-06	0.000504105	1.86	1.32	1.47	0.96	0.82	0.94	TMTC2	chr12	protein_coding	transmembrane O-mannosyltransferase targeting cadherins 2
ENSG00000183023.18	49.0882	-1.16429	0.322737	-3.60754	0.000309109	0.00988894	0.12	0.1	0.08	0.05	0.05	0.03	SLC8A1	chr2	protein_coding	solute carrier family 8 member A1
ENSG00000233695.2	32.6434	-1.17997	0.385966	-3.05718	0.00223429	0.0395466	0.18	0.22	0.2	0.1	0.06	0.1	GAS6-AS1	chr13	lncRNA	GAS6 antisense RNA 1
ENSG00000197959.14	51.3658	-1.00919	0.323876	-3.11596	0.00183346	0.034976	0.2	0.22	0.16	0.09	0.06	0.13	DNM3	chr1	protein_coding	dynamin 3
ENSG00000230373.8	378.03	-0.690427	0.179684	-3.84245	0.00012181	0.00480155	5.32	3.17	3.15	2.33	2.34	2.2	GOLGA6L5P	chr15	transcribed_unprocessed_pseudogene	golgin A6 family like 5, pseudogene
ENSG00000168874.13	48.1842	-1.0944	0.332763	-3.28883	0.00100605	0.0226941	0.25	0.22	0.21	0.08	0.15	0.08	ATOH8	chr2	protein_coding	atonal bHLH transcription factor 8
ENSG00000177096.9	115.626	0.86324	0.210943	4.09228	4.27e-05	0.00218553	1.04	1.12	1.05	1.81	1.73	2.11	PHETA2	chr22	protein_coding	PH domain containing endocytic trafficking adaptor 2
ENSG00000244242.2	1248.53	1.02727	0.117401	8.75015	2.13e-18	1.94e-15	5.04	5.6	5.86	10.51	10.95	10.97	IFITM10	chr11	protein_coding	interferon induced transmembrane protein 10
ENSG00000144554.13	422.034	-0.760669	0.137227	-5.54315	2.97e-08	4.59e-06	1.47	1.42	1.42	0.85	0.87	0.73	FANCD2	chr3	protein_coding	FA complementation group D2
ENSG00000197332.9	49.0964	-0.969152	0.323704	-2.99395	0.00275392	0.0444778	0.77	0.59	0.45	0.23	0.33	0.32	CTC-499B15.5	chr19	lncRNA	--
ENSG00000125462.19	345.933	-0.738191	0.154757	-4.77	1.84e-06	0.000165504	1.11	0.88	1.06	0.59	0.64	0.52	MIR9-1HG	chr1	lncRNA	MIR9-1 host gene
ENSG00000159403.18	44.5406	-1.13742	0.325203	-3.49757	0.000469513	0.0133362	0.33	0.3	0.38	0.13	0.15	0.16	C1R	chr12	protein_coding	complement C1r
ENSG00000000460.17	212.827	-0.627111	0.163968	-3.82458	0.000130993	0.00507294	1.43	1.4	1.34	0.85	0.92	0.83	C1orf112	chr1	protein_coding	chromosome 1 open reading frame 112
ENSG00000168542.16	652.559	-1.31597	0.131788	-9.98547	1.76e-23	1.95e-20	4.42	4.17	4.68	1.56	1.88	1.69	COL3A1	chr2	protein_coding	collagen type III alpha 1 chain
ENSG00000279161.1	231.606	-0.722468	0.164844	-4.38274	1.17e-05	0.000733166	4.02	4.08	3.73	2.38	1.99	2.53	CTB-12A17.2	chr19	TEC	--
ENSG00000272405.1	182.42	0.585895	0.18662	3.13951	0.00169233	0.0330176	1.52	1.19	1.65	2.15	1.91	2.25	RP11-284F21.10	chr1	lncRNA	--
ENSG00000132329.11	550.428	0.684597	0.16115	4.2482	2.15e-05	0.00121527	9.84	12.63	12.87	15.19	20.04	19.62	RAMP1	chr2	protein_coding	receptor activity modifying protein 1
ENSG00000126500.4	204.58	0.834795	0.175668	4.75213	2.01e-06	0.000177732	1.08	1.16	1.15	2.1	1.65	2.08	FLRT1	chr11	protein_coding	fibronectin leucine rich transmembrane protein 1
ENSG00000155660.11	18775.7	0.95435	0.090381	10.5592	4.61e-26	5.47e-23	124.53	126.04	123.08	230.23	238.61	227.79	PDIA4	chr7	protein_coding	protein disulfide isomerase family A member 4
ENSG00000196611.6	25.1596	4.9936	0.757077	6.5959	4.23e-11	1.15e-08	0	0.05	0	0.58	0.48	0.6	MMP1	chr11	protein_coding	matrix metallopeptidase 1
ENSG00000118513.19	162.154	-0.694159	0.186254	-3.72694	0.000193816	0.00680204	1.13	1.16	1.22	0.68	0.63	0.78	MYB	chr6	protein_coding	MYB proto-oncogene, transcription factor
ENSG00000117154.12	94.8952	1.12251	0.236496	4.7464	2.07e-06	0.0001818	0.56	0.63	0.7	1.18	1.47	1.32	IGSF21	chr1	protein_coding	immunoglobin superfamily member 21
ENSG00000164683.18	517.294	-0.660983	0.126322	-5.23251	1.67e-07	1.95e-05	4.01	3.62	3.53	2.17	2.21	2.41	HEY1	chr8	protein_coding	hes related family bHLH transcription factor with YRPW motif 1
ENSG00000139354.11	122.656	-0.752321	0.23025	-3.26741	0.00108535	0.0239241	0.84	0.64	0.52	0.47	0.35	0.32	GAS2L3	chr12	protein_coding	growth arrest specific 2 like 3
ENSG00000169100.14	262.468	0.664505	0.176642	3.76187	0.000168651	0.00610303	4.52	3.23	4.86	6.05	6.76	6.4	SLC25A6	chrX	protein_coding	solute carrier family 25 member 6
ENSG00000130222.11	244.332	0.920502	0.176508	5.21508	1.84e-07	2.1e-05	4.38	3.51	4.44	6.43	8.53	7.44	GADD45G	chr9	protein_coding	growth arrest and DNA damage inducible gamma
ENSG00000172987.13	41.7444	-1.3771	0.348032	-3.95682	7.6e-05	0.00330601	0.42	0.38	0.51	0.2	0.17	0.12	HPSE2	chr10	protein_coding	heparanase 2 (inactive)
ENSG00000128283.7	181.933	0.912257	0.180357	5.05807	4.24e-07	4.51e-05	1.49	1.8	1.49	2.79	3.02	2.88	CDC42EP1	chr22	protein_coding	CDC42 effector protein 1
ENSG00000127022.16	19696.4	0.641504	0.109038	5.88328	4.02e-09	7.67e-07	42.58	33.37	32.25	57.61	49.79	54.49	CANX	chr5	protein_coding	calnexin
ENSG00000176208.9	215.116	-0.705115	0.189582	-3.71931	0.000199764	0.00693679	1.59	1.08	0.98	0.7	0.75	0.69	ATAD5	chr17	protein_coding	ATPase family AAA domain containing 5
ENSG00000185737.13	117.007	-1.03268	0.211848	-4.87465	1.09e-06	0.00010397	0.99	0.92	1.01	0.42	0.51	0.44	NRG3	chr10	protein_coding	neuregulin 3
ENSG00000130592.17	153.332	0.845031	0.185131	4.5645	5.01e-06	0.000370176	0.57	0.59	0.54	1.01	0.91	1.02	LSP1	chr11	protein_coding	lymphocyte specific protein 1
ENSG00000134954.14	292.672	-0.611918	0.179282	-3.41316	0.000642132	0.0164721	2.1	1.36	1.34	1.13	0.94	0.93	ETS1	chr11	protein_coding	ETS proto-oncogene 1, transcription factor
ENSG00000114166.8	149.147	-0.659045	0.198307	-3.32335	0.000889418	0.0206666	1.32	0.93	1.14	0.64	0.69	0.73	KAT2B	chr3	protein_coding	lysine acetyltransferase 2B
ENSG00000255248.9	23.3272	-1.64558	0.468927	-3.50924	0.000449382	0.012955	0.04	0.04	0.03	0.01	0.02	0.01	MIR100HG	chr11	lncRNA	mir-100-let-7a-2-mir-125b-1 cluster host gene
ENSG00000163359.17	48.0022	3.69226	0.426949	8.64802	5.24e-18	4.05e-15	0.01	0	0.01	0.14	0.14	0.1	COL6A3	chr2	protein_coding	collagen type VI alpha 3 chain
ENSG00000144668.12	264.93	-0.807871	0.169697	-4.76066	1.93e-06	0.000172348	1.39	1.2	1.34	0.8	0.56	0.8	ITGA9	chr3	protein_coding	integrin subunit alpha 9
ENSG00000185736.16	53.6673	-1.56524	0.314475	-4.97732	6.45e-07	6.64e-05	0.3	0.2	0.23	0.09	0.07	0.07	ADARB2	chr10	protein_coding	adenosine deaminase RNA specific B2 (inactive)
ENSG00000101680.15	151.982	-0.848041	0.205619	-4.12432	3.72e-05	0.0019476	0.47	0.38	0.35	0.26	0.18	0.19	LAMA1	chr18	protein_coding	laminin subunit alpha 1
ENSG00000226777.7	202.263	1.06687	0.171989	6.20314	5.53e-10	1.36e-07	0.4	0.47	0.4	0.85	0.89	0.84	FAM30A	chr14	lncRNA	family with sequence similarity 30 member A
ENSG00000187676.8	99.0011	-0.798695	0.234683	-3.40329	0.000665788	0.0168101	1.12	0.72	0.85	0.49	0.49	0.5	B3GLCT	chr13	protein_coding	beta 3-glucosyltransferase
ENSG00000074842.8	3367.95	0.753682	0.130425	5.77867	7.53e-09	1.34e-06	42.85	48.95	52.56	68.97	88.09	77.6	MYDGF	chr19	protein_coding	myeloid derived growth factor
ENSG00000108821.14	239.505	0.630824	0.16558	3.80977	0.000139094	0.00525496	0.59	0.72	0.69	0.99	1.04	0.97	COL1A1	chr17	protein_coding	collagen type I alpha 1 chain
ENSG00000100219.16	14748.9	0.901298	0.104462	8.628	6.24e-18	4.59e-15	110.28	100.93	116.18	184.72	192.26	211.56	XBP1	chr22	protein_coding	X-box binding protein 1
ENSG00000154027.19	160.889	-1.03216	0.185608	-5.56098	2.68e-08	4.19e-06	1.14	0.96	0.91	0.47	0.47	0.47	AK5	chr1	protein_coding	adenylate kinase 5
ENSG00000261786.1	59.4096	-0.842601	0.282509	-2.98257	0.00285843	0.0456757	0.53	0.52	0.41	0.3	0.25	0.23	RP4-555D20.2	chr3	lncRNA	--
ENSG00000260428.3	93.3915	0.694785	0.22659	3.06627	0.00216751	0.0388994	2.1	2.07	2.05	3.14	2.97	3.57	SCX	chr8	protein_coding	scleraxis bHLH transcription factor
ENSG00000132334.17	107.014	-1.24846	0.238856	-5.22685	1.72e-07	1.99e-05	0.54	0.33	0.44	0.19	0.15	0.19	PTPRE	chr10	protein_coding	protein tyrosine phosphatase receptor type E
ENSG00000090520.12	6660.61	0.878988	0.117731	7.46609	8.26e-14	3.19e-11	17.78	14.53	15.98	26.45	32.57	26.2	DNAJB11	chr3	protein_coding	DnaJ heat shock protein family (Hsp40) member B11
ENSG00000121039.10	52.9545	-1.20443	0.298136	-4.03987	5.35e-05	0.00258249	0.44	0.42	0.47	0.18	0.2	0.17	RDH10	chr8	protein_coding	retinol dehydrogenase 10
ENSG00000269893.8	1803.79	0.615454	0.112772	5.45751	4.83e-08	6.78e-06	7.17	6.85	6.78	9.49	11.41	9.72	SNHG8	chr4	lncRNA	small nucleolar RNA host gene 8
ENSG00000141753.7	2286.82	0.600924	0.111846	5.37279	7.75e-08	9.98e-06	24.79	27.06	27.48	36.13	40.85	38.94	IGFBP4	chr17	protein_coding	insulin like growth factor binding protein 4
ENSG00000225614.4	321.006	0.79568	0.160909	4.94491	7.62e-07	7.74e-05	0.54	0.51	0.59	0.87	0.8	1.07	ZNF469	chr16	protein_coding	zinc finger protein 469
ENSG00000091436.17	398.648	-0.603954	0.149033	-4.05249	5.07e-05	0.00246899	1.28	1.12	0.97	0.79	0.61	0.73	MAP3K20	chr2	protein_coding	mitogen-activated protein kinase kinase kinase 20
ENSG00000180875.5	13.8238	-2.09364	0.679637	-3.08053	0.00206632	0.0376943	0.26	0.14	0.13	0.08	0.02	0.01	GREM2	chr1	protein_coding	gremlin 2, DAN family BMP antagonist
ENSG00000118473.23	398.131	-0.650524	0.142498	-4.56515	4.99e-06	0.000370176	0.7	0.6	0.55	0.41	0.34	0.38	SGIP1	chr1	protein_coding	SH3GL interacting endocytic adaptor 1
ENSG00000262528.2	71.2491	0.785802	0.257904	3.04687	0.00231235	0.0403891	1.08	1.19	1.27	1.8	2.11	2	LA16c-349E10.1	chr16	lncRNA	--
ENSG00000109674.4	199.999	-0.763491	0.194172	-3.93203	8.42e-05	0.00359545	3.4	2.69	2.28	1.93	1.39	1.4	NEIL3	chr4	protein_coding	nei like DNA glycosylase 3
ENSG00000188522.15	184.56	0.886453	0.191132	4.63792	3.52e-06	0.000280319	0.44	0.56	0.58	0.83	0.96	1.04	FAM83G	chr17	protein_coding	family with sequence similarity 83 member G
ENSG00000206384.10	29.7876	-1.21169	0.392646	-3.08595	0.00202906	0.037325	0.17	0.12	0.12	0.06	0.05	0.05	COL6A6	chr3	protein_coding	collagen type VI alpha 6 chain
ENSG00000137812.20	311.544	-0.951084	0.215799	-4.40727	1.05e-05	0.00066566	1.79	1.18	0.93	0.78	0.46	0.69	KNL1	chr15	protein_coding	kinetochore scaffold 1
ENSG00000136842.14	5604.42	-0.65897	0.0928669	-7.09586	1.29e-12	4.41e-10	59.35	60.27	60.3	36.94	36.67	36.08	TMOD1	chr9	protein_coding	tropomodulin 1
ENSG00000114315.4	69.5072	-1.00843	0.261572	-3.85527	0.000115602	0.0046112	1.46	1.36	1.52	0.64	0.73	0.7	HES1	chr3	protein_coding	hes family bHLH transcription factor 1
ENSG00000167807.15	427.589	0.623857	0.165902	3.76039	0.00016965	0.00612483	4.54	5.04	5.89	6.49	8.94	7.57	CTD-2369P2.10	chr19	protein_coding	--
ENSG00000179218.15	71371.8	0.912566	0.105253	8.67021	4.31e-18	3.51e-15	541.92	563	596.9	968.13	1108.56	1007.99	CALR	chr19	protein_coding	calreticulin
ENSG00000244300.3	322.714	-0.5895	0.150889	-3.90685	9.35e-05	0.00388902	5.02	3.97	3.92	2.56	2.84	2.82	GATA2-AS1	chr3	lncRNA	GATA2 antisense RNA 1
ENSG00000130487.9	51.876	2.88719	0.361466	7.98745	1.38e-15	6.87e-13	0.05	0.07	0.11	0.56	0.47	0.62	KLHDC7B	chr22	protein_coding	kelch domain containing 7B
ENSG00000279744.1	203.932	-1.15288	0.215035	-5.36139	8.26e-08	1.05e-05	5.56	5.56	5.28	3.15	1.47	2.49	RP13-20L14.10	chr17	TEC	--
ENSG00000279146.1	32.3373	-1.30644	0.384659	-3.39635	0.000682904	0.0171302	1.3	1.11	1	0.54	0.3	0.48	RP11-117L5.3	chr12	TEC	--
ENSG00000092621.13	15971.8	0.791961	0.118062	6.70802	1.97e-11	5.98e-09	36.26	42.16	43.99	62.74	68.38	73.3	PHGDH	chr1	protein_coding	phosphoglycerate dehydrogenase
ENSG00000095739.11	73.5345	-0.891348	0.261641	-3.40676	0.000657388	0.0166797	1.47	1.44	1.4	0.57	0.85	0.82	BAMBI	chr10	protein_coding	BMP and activin membrane bound inhibitor
ENSG00000204052.4	77.127	0.79742	0.265707	3.00113	0.00268982	0.0440287	0.69	0.77	1.08	1.37	1.58	1.33	LRRC73	chr6	protein_coding	leucine rich repeat containing 73
ENSG00000248498.4	22.3534	1.57886	0.453837	3.47892	0.000503435	0.0139784	0.16	0.13	0.1	0.33	0.35	0.42	ASNSP1	chr8	transcribed_unprocessed_pseudogene	asparagine synthetase pseudogene 1
ENSG00000255690.3	360.131	-0.751111	0.139212	-5.39545	6.84e-08	9.03e-06	2.91	2.86	2.99	1.75	1.61	1.64	TRIL	chr7	protein_coding	TLR4 interactor with leucine rich repeats
ENSG00000044574.9	27198.6	1.27127	0.0931199	13.652	1.97e-42	6.07e-39	82.65	77.11	75.75	183.21	192.25	170.84	HSPA5	chr9	protein_coding	heat shock protein family A (Hsp70) member 5
ENSG00000204381.12	171.577	-1.29415	0.19476	-6.64485	3.04e-11	8.53e-09	2.29	2.63	2.54	0.82	1.11	1	LAYN	chr11	protein_coding	layilin
ENSG00000145555.15	226.615	-0.606594	0.168654	-3.59668	0.000322301	0.0101844	0.62	0.6	0.66	0.43	0.34	0.43	MYO10	chr5	protein_coding	myosin X
ENSG00000141582.15	6498.78	0.627321	0.105426	5.95032	2.68e-09	5.44e-07	54.22	56.38	59.52	79.33	83.09	90.74	CBX4	chr17	protein_coding	chromobox 4
ENSG00000180616.9	67.8566	1.1697	0.276765	4.22633	2.38e-05	0.00131555	0.22	0.17	0.13	0.42	0.37	0.32	SSTR2	chr17	protein_coding	somatostatin receptor 2
ENSG00000189221.10	676.61	-0.586705	0.12647	-4.63909	3.5e-06	0.000280176	4.95	4.8	4.43	3.41	2.67	3.01	MAOA	chrX	protein_coding	monoamine oxidase A
ENSG00000179141.9	16.4266	1.76458	0.541933	3.25609	0.0011296	0.0245148	0.08	0.06	0.14	0.29	0.33	0.29	MTUS2-AS1	chr13	lncRNA	MTUS2 antisense RNA 1
ENSG00000112419.14	79.8157	-0.809581	0.262756	-3.08112	0.00206224	0.0376943	0.35	0.31	0.22	0.19	0.13	0.16	PHACTR2	chr6	protein_coding	phosphatase and actin regulator 2
ENSG00000198542.14	18.2111	2.65055	0.55767	4.7529	2.01e-06	0.000177732	0.04	0.02	0.02	0.14	0.17	0.17	ITGBL1	chr13	protein_coding	integrin subunit beta like 1
ENSG00000152784.16	629.936	0.596379	0.141885	4.20327	2.63e-05	0.00143143	3.26	3.38	3.87	4.68	5.78	4.85	PRDM8	chr4	protein_coding	PR/SET domain 8
ENSG00000101255.12	352.264	1.13896	0.145031	7.8532	4.06e-15	1.84e-12	2.13	2.06	2.24	4.28	4.85	4.53	TRIB3	chr20	protein_coding	tribbles pseudokinase 3
ENSG00000164054.16	130.61	0.602019	0.198238	3.03685	0.00239065	0.041228	0.76	0.8	0.71	1.02	1.17	1.12	SHISA5	chr3	protein_coding	shisa family member 5
ENSG00000111788.10	527.144	-0.604399	0.129476	-4.66804	3.04e-06	0.000248615	6.23	6.85	6.32	4.16	3.82	4.31	RP11-22B23.1	chr12	unprocessed_pseudogene	--
ENSG00000105048.17	10972.4	0.720795	0.116919	6.1649	7.05e-10	1.68e-07	114.47	129.29	132.5	181	218.16	198.34	TNNT1	chr19	protein_coding	troponin T1, slow skeletal type
ENSG00000128849.11	123.839	-1.28449	0.207523	-6.18962	6.03e-10	1.46e-07	0.67	0.64	0.65	0.29	0.23	0.25	CGNL1	chr15	protein_coding	cingulin like 1
ENSG00000076003.5	1182.2	-0.617114	0.111791	-5.52027	3.38e-08	4.98e-06	12.5	10.6	10.35	7.3	7.1	6.53	MCM6	chr2	protein_coding	minichromosome maintenance complex component 6
ENSG00000054598.9	189.524	-1.14162	0.175021	-6.52275	6.9e-11	1.84e-08	2.23	2.08	2.01	0.95	0.82	0.98	FOXC1	chr6	protein_coding	forkhead box C1
ENSG00000065717.15	339.858	0.707125	0.153795	4.59784	4.27e-06	0.000328174	1.74	2.26	1.98	3.17	3.22	3.05	TLE2	chr19	protein_coding	TLE family member 2, transcriptional corepressor
ENSG00000103024.8	182.017	0.597717	0.188754	3.16664	0.00154211	0.0309865	3.38	3.34	4.49	5.68	5.24	5.46	NME3	chr16	protein_coding	NME/NM23 nucleoside diphosphate kinase 3
ENSG00000106948.17	1139.61	0.691992	0.11519	6.00741	1.89e-09	3.99e-07	2.48	2.8	2.63	4.09	3.9	4.34	AKNA	chr9	protein_coding	AT-hook transcription factor
ENSG00000031698.13	16545.6	0.795564	0.0989776	8.03782	9.14e-16	4.87e-13	94.7	104.73	103.13	168.72	169.4	167.92	SARS1	chr1	protein_coding	seryl-tRNA synthetase 1
ENSG00000180801.14	151.902	-1.3845	0.19865	-6.96955	3.18e-12	1.02e-09	1.52	1.46	1.14	0.5	0.49	0.53	ARSJ	chr4	protein_coding	arylsulfatase family member J
ENSG00000248540.3	474.39	-0.740588	0.133784	-5.53569	3.1e-08	4.74e-06	5.85	5.31	6.18	3.38	3.38	3.22	RP11-247C2.2	chr15	lncRNA	--
ENSG00000284194.3	89.7972	0.776218	0.263445	2.94641	0.00321486	0.0494495	1.04	1.84	1.7	2.24	2.88	2.5	SCO2	chr22	protein_coding	synthesis of cytochrome C oxidase 2
ENSG00000092969.12	25.3205	-1.75381	0.442741	-3.96126	7.46e-05	0.00325437	0.2	0.2	0.22	0.08	0.04	0.05	TGFB2	chr1	protein_coding	transforming growth factor beta 2
ENSG00000280138.1	46.033	-1.18188	0.342386	-3.4519	0.000556661	0.0149852	0.12	0.1	0.12	0.04	0.03	0.07	RP11-463O12.5	chr12	TEC	--
ENSG00000185633.10	158.917	0.866742	0.192311	4.50698	6.58e-06	0.000463969	1.26	1.24	1.36	2.6	2.23	1.96	NDUFA4L2	chr12	protein_coding	NDUFA4 mitochondrial complex associated like 2
ENSG00000054803.4	383.118	0.727346	0.140607	5.17291	2.3e-07	2.58e-05	3.25	2.62	2.97	4.93	4.7	4.41	CBLN4	chr20	protein_coding	cerebellin 4 precursor
ENSG00000183780.13	155.829	-0.713179	0.194303	-3.67045	0.000242122	0.0081509	1.99	1.93	1.51	0.94	1.14	1.1	SLC35F3	chr1	protein_coding	solute carrier family 35 member F3
ENSG00000103257.9	1703.47	0.82554	0.128999	6.39959	1.56e-10	3.95e-08	7.34	9.16	8.32	15.3	12.28	14.88	SLC7A5	chr16	protein_coding	solute carrier family 7 member 5
ENSG00000128165.9	152.57	1.38203	0.201563	6.85658	7.05e-12	2.18e-09	0.54	0.67	0.68	1.46	1.76	1.54	ADM2	chr22	protein_coding	adrenomedullin 2
ENSG00000186017.15	68.5569	-0.835868	0.279082	-2.99507	0.00274384	0.0444778	0.55	0.39	0.38	0.27	0.17	0.26	ZNF566	chr19	protein_coding	zinc finger protein 566
ENSG00000170345.10	95.4678	-5.59545	0.485346	-11.5288	9.45e-31	1.62e-27	1.8	2.07	1.79	0.05	0.06	0	FOS	chr14	protein_coding	Fos proto-oncogene, AP-1 transcription factor subunit
ENSG00000140543.15	26.576	-1.33622	0.439198	-3.04242	0.00234685	0.0407456	0.17	0.23	0.13	0.09	0.07	0.05	DET1	chr15	protein_coding	DET1 partner of COP1 E3 ubiquitin ligase
ENSG00000140451.13	226.989	-0.613587	0.165649	-3.70415	0.000212102	0.0072509	1.77	1.89	2.02	1.2	1.12	1.26	PIF1	chr15	protein_coding	PIF1 5'-to-3' DNA helicase
ENSG00000099869.8	55.5453	1.10991	0.324092	3.42469	0.00061549	0.0159573	0.45	0.23	0.51	0.7	0.81	0.94	IGF2-AS	chr11	lncRNA	IGF2 antisense RNA
ENSG00000153233.13	268.616	0.72679	0.170131	4.27194	1.94e-05	0.00112146	1.51	1.26	1.12	2.37	1.7	2.11	PTPRR	chr12	protein_coding	protein tyrosine phosphatase receptor type R
ENSG00000259820.1	18.4879	-1.61268	0.533859	-3.02079	0.00252118	0.042361	0.17	0.11	0.15	0.08	0.03	0.03	AC083843.1	chr8	lncRNA	--
ENSG00000112038.18	372.253	-0.853966	0.196287	-4.35061	1.36e-05	0.000825894	0.98	0.69	0.54	0.46	0.29	0.41	OPRM1	chr6	protein_coding	opioid receptor mu 1
ENSG00000140285.12	71.9598	0.773162	0.256274	3.01694	0.00255341	0.0427468	0.25	0.3	0.24	0.41	0.42	0.46	FGF7	chr15	protein_coding	fibroblast growth factor 7
ENSG00000099994.11	66.9289	1.67525	0.290211	5.77253	7.81e-09	1.37e-06	0.17	0.18	0.25	0.52	0.69	0.67	SUSD2	chr22	protein_coding	sushi domain containing 2
ENSG00000076662.10	244.992	0.622329	0.174296	3.57052	0.000356274	0.0109446	2.08	2.33	2.25	2.84	3.13	3.92	ICAM3	chr19	protein_coding	intercellular adhesion molecule 3
ENSG00000162298.19	762.685	0.646563	0.127808	5.05885	4.22e-07	4.51e-05	3.18	3.75	3.47	5.1	5.6	5.01	SYVN1	chr11	protein_coding	synoviolin 1
ENSG00000066468.24	32.2279	-1.69406	0.421359	-4.02047	5.81e-05	0.00273624	0.1	0.08	0.07	0.01	0.03	0.03	FGFR2	chr10	protein_coding	fibroblast growth factor receptor 2
ENSG00000165985.10	24.5296	1.43031	0.432857	3.30436	0.000951947	0.0217275	0.16	0.2	0.18	0.56	0.37	0.47	C1QL3	chr10	protein_coding	complement C1q like 3
ENSG00000146674.16	2093.63	-1.34578	0.101179	-13.301	2.28e-40	5.88e-37	21.73	20.36	21.34	8.27	7.47	8.28	IGFBP3	chr7	protein_coding	insulin like growth factor binding protein 3
ENSG00000171724.3	771.407	-0.645271	0.132742	-4.86109	1.17e-06	0.000109327	7.3	7.34	7.47	5.26	3.8	4.56	VAT1L	chr16	protein_coding	vesicle amine transport 1 like
ENSG00000111799.22	50.5302	2.15984	0.352021	6.13553	8.49e-10	1.99e-07	0.02	0.03	0.04	0.16	0.16	0.09	COL12A1	chr6	protein_coding	collagen type XII alpha 1 chain
ENSG00000143013.13	58.2784	-1.10697	0.301068	-3.67682	0.000236158	0.0079675	0.4	0.49	0.51	0.21	0.26	0.16	LMO4	chr1	protein_coding	LIM domain only 4
ENSG00000147257.15	214.422	-0.957479	0.191327	-5.00441	5.6e-07	5.85e-05	2.66	3.32	3.49	1.39	1.46	1.87	GPC3	chrX	protein_coding	glypican 3
ENSG00000244953.1	58.848	-1.00383	0.298355	-3.36455	0.000766689	0.0187748	1.47	1.03	1.22	0.49	0.51	0.77	RP11-613D13.8	chr11	lncRNA	--
ENSG00000103253.19	559.699	0.602611	0.127149	4.73939	2.14e-06	0.000186084	2.58	2.68	2.73	3.67	3.98	4.04	HAGHL	chr16	protein_coding	hydroxyacylglutathione hydrolase like
ENSG00000122012.14	1444.34	-0.779613	0.133422	-5.84323	5.12e-09	9.42e-07	5.55	4.74	4.64	3.09	2.2	3.07	SV2C	chr5	protein_coding	synaptic vesicle glycoprotein 2C
ENSG00000127418.15	117.319	-0.637495	0.216305	-2.94721	0.00320655	0.0493995	0.96	1.07	1.13	0.64	0.57	0.76	FGFRL1	chr4	protein_coding	fibroblast growth factor receptor like 1
ENSG00000141655.17	19.5025	-1.56982	0.50711	-3.09562	0.00196405	0.0365204	0.09	0.08	0.14	0.05	0.03	0.03	TNFRSF11A	chr18	protein_coding	TNF receptor superfamily member 11a
ENSG00000152284.5	75.8166	-1.0041	0.28337	-3.54344	0.000394936	0.011781	0.58	0.73	0.88	0.26	0.43	0.36	TCF7L1	chr2	protein_coding	transcription factor 7 like 1
ENSG00000165886.5	338.588	0.64765	0.173109	3.74128	0.000183082	0.00653346	4.45	5.22	5.71	6.32	8.05	8.91	UBTD1	chr10	protein_coding	ubiquitin domain containing 1
ENSG00000115596.4	218.645	0.764736	0.192692	3.9687	7.23e-05	0.00318493	2.66	3.05	3.35	3.99	5.89	4.96	WNT6	chr2	protein_coding	Wnt family member 6
ENSG00000187741.15	421.763	-0.603936	0.155329	-3.8881	0.000101033	0.00409752	1.45	1.83	1.74	1.09	0.92	1.18	FANCA	chr16	protein_coding	FA complementation group A
ENSG00000133110.15	15.4967	4.99749	0.962403	5.19272	2.07e-07	2.34e-05	0.01	0	0.01	0.15	0.23	0.13	POSTN	chr13	protein_coding	periostin
ENSG00000167995.17	86.3905	1.23199	0.264874	4.65121	3.3e-06	0.000266153	0.13	0.21	0.23	0.47	0.43	0.39	BEST1	chr11	protein_coding	bestrophin 1
ENSG00000198286.10	46.1091	1.59556	0.337524	4.72726	2.28e-06	0.000193205	0.13	0.14	0.21	0.5	0.48	0.41	CARD11	chr7	protein_coding	caspase recruitment domain family member 11
ENSG00000116774.12	119.353	-0.705558	0.210346	-3.35427	0.00079575	0.0191228	1.57	1.66	1.81	1.03	0.89	1.07	OLFML3	chr1	protein_coding	olfactomedin like 3
ENSG00000130203.10	1390.09	0.906256	0.145384	6.23353	4.56e-10	1.14e-07	12.84	14.24	16.09	21.62	29.87	26.51	APOE	chr19	protein_coding	apolipoprotein E
ENSG00000029153.14	23.7642	-1.41068	0.449863	-3.13579	0.00171391	0.0332463	0.18	0.15	0.15	0.07	0.03	0.07	ARNTL2	chr12	protein_coding	aryl hydrocarbon receptor nuclear translocator like 2
ENSG00000038427.16	229.303	-0.868879	0.206352	-4.21067	2.55e-05	0.00140008	0.82	0.6	0.54	0.41	0.24	0.39	VCAN	chr5	protein_coding	versican
ENSG00000135476.12	708.185	-0.609223	0.132727	-4.59005	4.43e-06	0.000337302	2.84	3.42	3.01	1.94	1.79	2.13	ESPL1	chr12	protein_coding	extra spindle pole bodies like 1, separase
ENSG00000176641.11	300.533	-0.635743	0.179342	-3.54487	0.000392804	0.01174	1.51	1.06	0.91	0.8	0.67	0.66	RNF152	chr18	protein_coding	ring finger protein 152
ENSG00000254858.10	139.775	0.692665	0.197767	3.50243	0.000461034	0.013168	1.61	1.49	1.8	2.36	2.74	2.52	MPV17L2	chr19	protein_coding	MPV17 mitochondrial inner membrane protein like 2
ENSG00000113273.17	102.327	-0.675675	0.219233	-3.08199	0.00205621	0.0376898	0.46	0.46	0.45	0.28	0.24	0.3	ARSB	chr5	protein_coding	arylsulfatase B
ENSG00000184156.17	53.6052	-1.03174	0.314987	-3.2755	0.00105475	0.0234679	0.24	0.14	0.16	0.1	0.07	0.09	KCNQ3	chr8	protein_coding	potassium voltage-gated channel subfamily Q member 3
ENSG00000184164.15	3038.77	1.79244	0.105872	16.9303	2.69e-64	2.08e-60	8.28	8.43	8.68	26.11	29.03	29.52	CRELD2	chr22	protein_coding	cysteine rich with EGF like domains 2
ENSG00000135842.17	105.981	1.00553	0.23802	4.22455	2.39e-05	0.00132126	0.33	0.25	0.24	0.66	0.42	0.49	NIBAN1	chr1	protein_coding	niban apoptosis regulator 1
ENSG00000132026.15	101.556	0.734393	0.225466	3.25722	0.00112511	0.0244517	0.95	0.8	0.99	1.45	1.63	1.3	RTBDN	chr19	protein_coding	retbindin
ENSG00000164056.11	75.3747	-1.32897	0.260482	-5.10196	3.36e-07	3.68e-05	0.89	0.99	0.75	0.33	0.33	0.34	SPRY1	chr4	protein_coding	sprouty RTK signaling antagonist 1
ENSG00000155760.3	347.042	-0.770292	0.139464	-5.52323	3.33e-08	4.95e-06	3.08	3.03	3.09	1.79	1.7	1.7	FZD7	chr2	protein_coding	frizzled class receptor 7
ENSG00000125398.8	62.295	-0.862403	0.286452	-3.01064	0.00260701	0.0432289	0.6	0.66	0.71	0.45	0.31	0.28	SOX9	chr17	protein_coding	SRY-box transcription factor 9
ENSG00000265972.6	98.1654	-0.71552	0.222992	-3.20872	0.00133327	0.0276161	1.15	0.98	1.14	0.64	0.63	0.64	TXNIP	chr1	protein_coding	thioredoxin interacting protein
ENSG00000196639.7	21.084	-2.14184	0.548798	-3.90278	9.51e-05	0.00391841	0.21	0.22	0.16	0.01	0.05	0.07	HRH1	chr3	protein_coding	histamine receptor H1
ENSG00000187479.8	4478.86	-0.594096	0.107353	-5.53406	3.13e-08	4.74e-06	84.87	91.18	95.07	54.49	60.05	58.51	C11orf96	chr11	protein_coding	chromosome 11 open reading frame 96
ENSG00000169418.10	21.167	-1.72623	0.492096	-3.50791	0.000451645	0.0129718	0.14	0.23	0.25	0.07	0.06	0.05	NPR1	chr1	protein_coding	natriuretic peptide receptor 1
ENSG00000183010.17	9031.86	0.910506	0.115817	7.86157	3.79e-15	1.78e-12	62.47	72.81	73.77	116.18	129.42	133.28	PYCR1	chr17	protein_coding	pyrroline-5-carboxylate reductase 1
ENSG00000173706.14	126.14	-1.11619	0.241724	-4.61761	3.88e-06	0.000304482	0.58	0.54	0.55	0.31	0.15	0.29	HEG1	chr3	protein_coding	heart development protein with EGF like domains 1
ENSG00000148737.17	203.266	-1.06938	0.177088	-6.0387	1.55e-09	3.38e-07	1.21	1.32	1.4	0.65	0.62	0.54	TCF7L2	chr10	protein_coding	transcription factor 7 like 2
ENSG00000080224.17	42.5678	-0.990758	0.325557	-3.04327	0.00234022	0.0406762	0.33	0.28	0.27	0.16	0.14	0.13	EPHA6	chr3	protein_coding	EPH receptor A6
ENSG00000099250.18	161.387	-1.11098	0.188314	-5.89962	3.64e-09	7.13e-07	0.71	0.55	0.59	0.28	0.27	0.27	NRP1	chr10	protein_coding	neuropilin 1
ENSG00000244607.7	94.6078	0.70411	0.230358	3.05658	0.00223876	0.0395804	0.32	0.37	0.29	0.49	0.55	0.5	CCDC13	chr3	protein_coding	coiled-coil domain containing 13
ENSG00000182199.11	4759.13	0.688547	0.1274	5.40461	6.5e-08	8.73e-06	21.61	27.58	27.07	36.28	40.8	41.55	SHMT2	chr12	protein_coding	serine hydroxymethyltransferase 2
ENSG00000212907.2	67672.3	-0.673768	0.128046	-5.26191	1.43e-07	1.75e-05	7898.06	9555.44	9481.44	6150.28	4574.33	5584.9	MT-ND4L	chrM	protein_coding	mitochondrially encoded NADH:ubiquinone oxidoreductase core subunit 4L
ENSG00000105204.14	853.097	0.602558	0.130624	4.61292	3.97e-06	0.000309856	6.06	7.11	7.23	9.21	10.17	10.52	DYRK1B	chr19	protein_coding	dual specificity tyrosine phosphorylation regulated kinase 1B
ENSG00000163703.20	212.35	0.786738	0.175112	4.49278	7.03e-06	0.000487125	0.62	0.45	0.56	0.98	0.85	0.86	CRELD1	chr3	protein_coding	cysteine rich with EGF like domains 1
ENSG00000135406.14	152.851	0.791497	0.188862	4.19087	2.78e-05	0.00150136	1.11	1.11	1.16	1.81	2.07	1.77	PRPH	chr12	protein_coding	peripherin
ENSG00000133863.9	87.2996	-0.840033	0.255481	-3.28804	0.00100888	0.0227247	0.38	0.29	0.24	0.19	0.12	0.17	TEX15	chr8	protein_coding	testis expressed 15, meiosis and synapsis associated
ENSG00000169136.12	367.655	0.763214	0.145222	5.2555	1.48e-07	1.8e-05	2.79	3.19	3.08	4.65	4.9	5.29	ATF5	chr19	protein_coding	activating transcription factor 5
ENSG00000007376.8	496.767	0.605884	0.160549	3.77382	0.000160767	0.00588667	3.78	4.69	5.18	5.8	6.9	7.38	RPUSD1	chr16	protein_coding	RNA pseudouridine synthase domain containing 1
ENSG00000269891.2	180.171	-0.670096	0.225535	-2.97114	0.00296694	0.0467331	1.83	1.98	1.42	1.46	0.73	0.97	ARHGAP19-SLIT1	chr10	protein_coding	ARHGAP19-SLIT1 readthrough (NMD candidate)
ENSG00000265646.2	68.341	-0.795787	0.269454	-2.95333	0.00314363	0.0487705	2.46	1.9	1.88	1.27	0.9	1.27	TUFMP1	chr17	processed_pseudogene	Tu translation elongation factor, mitochondrial pseudogene 1
ENSG00000101335.10	19.0844	1.70093	0.48927	3.47648	0.00050805	0.0140185	0.1	0.11	0.1	0.34	0.33	0.29	MYL9	chr20	protein_coding	myosin light chain 9
ENSG00000149257.16	1673.07	0.736268	0.114755	6.41602	1.4e-10	3.6e-08	5.99	6.76	6.48	9.56	10.4	10.92	SERPINH1	chr11	protein_coding	serpin family H member 1
ENSG00000175787.17	144.763	-0.605365	0.20115	-3.00952	0.00261661	0.043255	1.05	1	0.93	0.76	0.5	0.61	ZNF169	chr9	protein_coding	zinc finger protein 169
ENSG00000110092.4	8623.5	-0.726736	0.0907282	-8.01004	1.15e-15	5.91e-13	78.79	68.43	70.83	42.6	42	41.98	CCND1	chr11	protein_coding	cyclin D1
ENSG00000145349.18	613.641	-0.668731	0.149751	-4.46563	7.98e-06	0.000534284	3.38	2.45	2.44	1.86	1.39	1.74	CAMK2D	chr4	protein_coding	calcium/calmodulin dependent protein kinase II delta
ENSG00000164692.18	102.294	4.19955	0.32268	13.0146	1.01e-38	2.23e-35	0.03	0.02	0.05	0.54	0.53	0.59	COL1A2	chr7	protein_coding	collagen type I alpha 2 chain
ENSG00000137801.11	123.421	0.733835	0.2171	3.38017	0.000724405	0.0178525	0.35	0.26	0.36	0.58	0.53	0.45	THBS1	chr15	protein_coding	thrombospondin 1
ENSG00000196739.15	98.9836	-0.726059	0.227669	-3.1891	0.00142714	0.0292082	0.29	0.32	0.24	0.16	0.15	0.18	COL27A1	chr9	protein_coding	collagen type XXVII alpha 1 chain
ENSG00000104332.12	343.016	-0.836158	0.142211	-5.87971	4.11e-09	7.74e-07	3.26	2.95	2.77	1.73	1.58	1.52	SFRP1	chr8	protein_coding	secreted frizzled related protein 1
ENSG00000047648.23	34.3912	-1.32247	0.380704	-3.47374	0.000513253	0.0140867	0.18	0.19	0.16	0.08	0.04	0.08	ARHGAP6	chrX	protein_coding	Rho GTPase activating protein 6
ENSG00000288550.2	1959.23	1.04826	0.115344	9.08811	1.01e-19	9.73e-17	9.91	10.4	10.93	19.33	22.62	20.25	RP11-1020A11.3	chr3	protein_coding	--
ENSG00000166794.6	27468.6	0.862622	0.112578	7.66244	1.82e-14	7.62e-12	135.45	146.75	147.39	228.54	279.68	243.77	PPIB	chr15	protein_coding	peptidylprolyl isomerase B
ENSG00000172461.11	96.2288	-1.07922	0.253569	-4.25613	2.08e-05	0.00118598	0.38	0.3	0.24	0.17	0.1	0.15	FUT9	chr6	protein_coding	fucosyltransferase 9
ENSG00000161960.16	176.655	-0.702635	0.174621	-4.02377	5.73e-05	0.00270639	1.4	1.33	1.33	0.8	0.76	0.84	EIF4A1	chr17	protein_coding	eukaryotic translation initiation factor 4A1
ENSG00000214826.5	436.922	-0.639048	0.135915	-4.70183	2.58e-06	0.000213052	6.41	5.26	5.78	3.77	3.29	3.7	DDX12P	chr12	unprocessed_pseudogene	DEAD/H-box helicase 12, pseudogene
ENSG00000240583.14	640.839	0.704068	0.134306	5.24225	1.59e-07	1.9e-05	4.64	4.48	5.26	6.86	8.09	7.63	AQP1	chr7	protein_coding	aquaporin 1 (Colton blood group)
ENSG00000058866.15	15.8337	-2.1001	0.589683	-3.5614	0.000368879	0.0111763	0.05	0.09	0.08	0.01	0.02	0.02	DGKG	chr3	protein_coding	diacylglycerol kinase gamma
ENSG00000168546.11	84.3609	-1.13944	0.25412	-4.48386	7.33e-06	0.000503436	0.57	0.74	0.63	0.31	0.23	0.31	GFRA2	chr8	protein_coding	GDNF family receptor alpha 2
ENSG00000120254.16	1741.97	0.799456	0.106208	7.52723	5.18e-14	2.11e-11	8.39	8.37	8.3	13.4	14.99	13.56	MTHFD1L	chr6	protein_coding	methylenetetrahydrofolate dehydrogenase (NADP+ dependent) 1 like
ENSG00000086717.18	155.643	-0.818073	0.201869	-4.05249	5.07e-05	0.00246899	2.26	1.61	1.61	1.11	1.01	0.85	PPEF1	chrX	protein_coding	protein phosphatase with EF-hand domain 1
ENSG00000006611.17	36.13	-1.34692	0.371681	-3.62385	0.000290246	0.00944703	0.29	0.34	0.39	0.14	0.15	0.09	USH1C	chr11	protein_coding	USH1 protein network component harmonin
ENSG00000184828.10	161.082	0.654358	0.207891	3.14761	0.00164612	0.0324024	0.52	0.43	0.64	0.83	0.67	0.9	ZBTB7C	chr18	protein_coding	zinc finger and BTB domain containing 7C
ENSG00000125740.14	25.5778	-1.67197	0.480472	-3.47985	0.000501695	0.0139784	0.21	0.23	0.23	0.13	0.03	0.05	FOSB	chr19	protein_coding	FosB proto-oncogene, AP-1 transcription factor subunit
ENSG00000184613.11	259.497	0.694517	0.153219	4.53284	5.82e-06	0.000414402	1.08	0.92	1	1.55	1.49	1.6	NELL2	chr12	protein_coding	neural EGFL like 2
ENSG00000262691.1	154.41	-0.813382	0.186189	-4.36858	1.25e-05	0.000772605	2.64	2.2	2.27	1.29	1.24	1.35	CTC-277H1.7	chr16	lncRNA	--
ENSG00000112186.12	78.5504	-0.892389	0.255439	-3.49355	0.000476636	0.0134643	1.2	0.81	0.95	0.49	0.48	0.55	CAP2	chr6	protein_coding	cyclase associated actin cytoskeleton regulatory protein 2
ENSG00000166145.15	109.19	0.93491	0.216134	4.3256	1.52e-05	0.00091461	0.67	0.69	0.67	1.2	1.39	1.16	SPINT1	chr15	protein_coding	serine peptidase inhibitor, Kunitz type 1
ENSG00000117016.10	2489.29	0.776417	0.128655	6.03487	1.59e-09	3.41e-07	7.26	8.42	8.63	13.85	11.4	14.96	RIMS3	chr1	protein_coding	regulating synaptic membrane exocytosis 3
ENSG00000183807.8	13.4822	2.64869	0.663149	3.99411	6.49e-05	0.00295121	0.07	0.11	0.17	0.53	0.57	0.99	FAM162B	chr6	protein_coding	family with sequence similarity 162 member B
ENSG00000121410.12	154.423	0.676301	0.226751	2.98258	0.00285831	0.0456757	0.67	1.06	1.11	1.21	1.56	1.64	A1BG	chr19	protein_coding	alpha-1-B glycoprotein
ENSG00000154175.18	52.8509	-1.27083	0.317609	-4.00125	6.3e-05	0.00289036	0.26	0.25	0.15	0.09	0.08	0.09	ABI3BP	chr3	protein_coding	ABI family member 3 binding protein
ENSG00000198400.13	4889.52	5.65617	0.156513	36.1388	5.59e-286	8.63e-282	0.94	1.21	1.35	58.9	45.68	66.51	NTRK1	chr1	protein_coding	neurotrophic receptor tyrosine kinase 1
ENSG00000115363.14	33.7309	-1.19821	0.392685	-3.05132	0.00227839	0.040052	0.55	0.62	0.49	0.13	0.24	0.32	EVA1A	chr2	protein_coding	eva-1 homolog A, regulator of programmed cell death
ENSG00000123329.20	72.8196	1.6807	0.280089	6.0006	1.97e-09	4.1e-07	0.17	0.21	0.27	0.6	0.75	0.66	ARHGAP9	chr12	protein_coding	Rho GTPase activating protein 9
ENSG00000183137.15	245.671	-0.588956	0.189612	-3.10611	0.00189563	0.0355477	0.72	0.55	0.43	0.4	0.29	0.38	CEP57L1	chr6	protein_coding	centrosomal protein 57 like 1
ENSG00000104368.19	127.242	-0.9679	0.217817	-4.44364	8.84e-06	0.000575013	0.69	0.64	0.75	0.27	0.36	0.4	PLAT	chr8	protein_coding	plasminogen activator, tissue type
ENSG00000139318.8	784.504	-0.646514	0.128906	-5.0154	5.29e-07	5.56e-05	8.87	7.22	7.88	5.52	4.85	4.33	DUSP6	chr12	protein_coding	dual specificity phosphatase 6
ENSG00000106018.14	211.826	-1.21778	0.181959	-6.69258	2.19e-11	6.39e-09	1.68	1.85	2.02	0.74	0.68	0.88	VIPR2	chr7	protein_coding	vasoactive intestinal peptide receptor 2
ENSG00000164946.20	69.4135	-0.986371	0.302015	-3.26596	0.00109093	0.0239787	0.36	0.37	0.34	0.27	0.14	0.12	FREM1	chr9	protein_coding	FRAS1 related extracellular matrix 1
ENSG00000065911.13	1898.98	0.617823	0.10213	6.04936	1.45e-09	3.21e-07	4.55	4.13	3.96	6.4	6.4	5.84	MTHFD2	chr2	protein_coding	methylenetetrahydrofolate dehydrogenase (NADP+ dependent) 2, methenyltetrahydrofolate cyclohydrolase
ENSG00000173110.8	122.06	-0.998785	0.223917	-4.46052	8.18e-06	0.000542231	2.01	2.22	2.41	0.97	1.33	0.91	HSPA6	chr1	protein_coding	heat shock protein family A (Hsp70) member 6
ENSG00000134684.12	5774.99	0.719174	0.107595	6.68406	2.32e-11	6.65e-09	14.11	15.93	15.99	24.12	25.4	23.52	YARS1	chr1	protein_coding	tyrosyl-tRNA synthetase 1
ENSG00000152910.19	117.169	1.32134	0.224051	5.89749	3.69e-09	7.13e-07	0.3	0.24	0.28	0.71	0.51	0.72	CNTNAP4	chr16	protein_coding	contactin associated protein family member 4
ENSG00000163032.12	113.863	-0.863071	0.223891	-3.85488	0.000115787	0.0046112	1.26	1.44	1.04	0.77	0.62	0.59	VSNL1	chr2	protein_coding	visinin like 1
ENSG00000113810.16	2058.14	-0.595083	0.146973	-4.04891	5.15e-05	0.00249248	12.3	9.7	7.43	6.97	5.4	6.28	SMC4	chr3	protein_coding	structural maintenance of chromosomes 4
ENSG00000130635.16	860.346	-0.879064	0.131291	-6.69553	2.15e-11	6.39e-09	2.88	3.28	3.45	1.73	1.51	1.79	COL5A1	chr9	protein_coding	collagen type V alpha 1 chain
ENSG00000166033.13	109.257	-1.08228	0.224093	-4.8296	1.37e-06	0.000123625	1.95	2.01	2.38	0.87	0.98	1.04	HTRA1	chr10	protein_coding	HtrA serine peptidase 1
ENSG00000130513.6	127.138	0.900815	0.219265	4.10835	3.99e-05	0.00205941	1.42	1.41	1.27	2.47	2.96	1.92	GDF15	chr19	protein_coding	growth differentiation factor 15
ENSG00000129991.13	1955.34	0.592704	0.128968	4.59573	4.31e-06	0.000329873	22.36	25.85	25.53	32.07	40.8	34.28	TNNI3	chr19	protein_coding	troponin I3, cardiac type
ENSG00000174791.11	137.461	1.0885	0.206796	5.26366	1.41e-07	1.75e-05	0.5	0.54	0.53	1.08	1.24	0.91	RIN1	chr11	protein_coding	Ras and Rab interactor 1
ENSG00000164142.16	52.6	-1.00886	0.301397	-3.34728	0.000816075	0.0194599	0.22	0.16	0.19	0.08	0.09	0.11	FAM160A1	chr4	protein_coding	--
ENSG00000100314.4	79.5133	2.0432	0.285606	7.15393	8.43e-13	3.03e-10	0.22	0.38	0.29	0.99	1.45	1.12	CABP7	chr22	protein_coding	calcium binding protein 7
ENSG00000182747.5	275.426	0.616669	0.157882	3.90589	9.39e-05	0.00388902	2.81	2.93	3.19	4.44	4.73	4.03	SLC35D3	chr6	protein_coding	solute carrier family 35 member D3
ENSG00000197956.10	1316.33	0.665922	0.123602	5.38765	7.14e-08	9.27e-06	29.95	35.35	35.48	49.01	54.53	50.7	S100A6	chr1	protein_coding	S100 calcium binding protein A6
ENSG00000152926.15	262.242	-0.622657	0.183464	-3.39389	0.000689076	0.0172571	1.26	0.86	0.77	0.67	0.53	0.6	ZNF117	chr7	protein_coding	zinc finger protein 117
ENSG00000267120.3	541.884	0.615663	0.135536	4.54244	5.56e-06	0.00039964	6.41	7.14	7.82	10.87	10.18	10.57	AD000671.6	chr19	protein_coding	--
ENSG00000129910.8	13.3698	2.51248	0.6605	3.8039	0.000142435	0.00536095	0.01	0.03	0.04	0.2	0.13	0.12	CDH15	chr16	protein_coding	cadherin 15
ENSG00000132205.11	117.646	0.725924	0.229622	3.16139	0.00157018	0.0311857	0.32	0.53	0.46	0.7	0.74	0.67	EMILIN2	chr18	protein_coding	elastin microfibril interfacer 2
ENSG00000261342.1	102.77	1.01424	0.257827	3.93381	8.36e-05	0.00357873	0.95	1.39	1.76	2.26	3.03	2.76	AC006538.1	chr19	lncRNA	--
ENSG00000139629.16	279.237	-0.841009	0.163504	-5.14367	2.69e-07	2.97e-05	1.36	1.72	1.61	0.89	0.82	0.82	GALNT6	chr12	protein_coding	polypeptide N-acetylgalactosaminyltransferase 6
ENSG00000183722.9	85.0045	-1.14645	0.253138	-4.52897	5.93e-06	0.000420129	0.9	0.67	0.91	0.34	0.41	0.32	LHFPL6	chr13	protein_coding	LHFPL tetraspan subfamily member 6
ENSG00000187796.15	599.037	0.635246	0.128939	4.92671	8.36e-07	8.39e-05	2.19	2.28	2.27	3.04	3.52	3.53	CARD9	chr9	protein_coding	caspase recruitment domain family member 9
ENSG00000073910.23	355.238	-0.589449	0.151903	-3.88042	0.000104275	0.00420693	0.78	0.67	0.73	0.52	0.38	0.49	FRY	chr13	protein_coding	FRY microtubule binding protein
ENSG00000152578.13	268.81	-0.618065	0.172906	-3.57456	0.000350812	0.0107983	1.3	0.84	0.99	0.67	0.65	0.63	GRIA4	chr11	protein_coding	glutamate ionotropic receptor AMPA type subunit 4
ENSG00000111341.10	46.0163	-1.18316	0.330627	-3.57853	0.000345533	0.0106884	0.64	0.89	0.6	0.29	0.34	0.27	MGP	chr12	protein_coding	matrix Gla protein
ENSG00000091490.11	91.3632	-1.05108	0.244351	-4.3015	1.7e-05	0.0010005	0.6	0.51	0.48	0.28	0.27	0.18	SEL1L3	chr4	protein_coding	SEL1L family member 3
ENSG00000144354.14	766.07	-0.669019	0.127876	-5.23179	1.68e-07	1.95e-05	9.19	6.82	7.13	4.72	4.54	4.68	CDCA7	chr2	protein_coding	cell division cycle associated 7
ENSG00000150347.17	243.35	-0.875902	0.179291	-4.88537	1.03e-06	9.91e-05	1.41	1.03	1.05	0.66	0.49	0.67	ARID5B	chr10	protein_coding	AT-rich interaction domain 5B
ENSG00000264860.1	77.8815	0.808146	0.247548	3.2646	0.00109618	0.0240579	3.07	3.34	2.87	5.75	5.26	4.65	RP11-143K11.5	chr17	lncRNA	--
ENSG00000162576.17	118.828	0.728116	0.236836	3.07435	0.00210963	0.0382158	0.58	0.88	0.9	1.11	1.17	1.52	MXRA8	chr1	protein_coding	matrix remodeling associated 8
ENSG00000120738.8	242.199	-3.24924	0.198625	-16.3587	3.77e-60	1.94e-56	4.48	4.35	4.64	0.45	0.36	0.56	EGR1	chr5	protein_coding	early growth response 1
ENSG00000170743.17	36.9017	-1.35746	0.361485	-3.75523	0.000173181	0.00623775	0.36	0.34	0.37	0.17	0.1	0.14	SYT9	chr11	protein_coding	synaptotagmin 9
ENSG00000144824.21	51.3437	-1.07473	0.319645	-3.36226	0.000773059	0.0189008	0.22	0.2	0.13	0.09	0.06	0.1	PHLDB2	chr3	protein_coding	pleckstrin homology like domain family B member 2
ENSG00000179111.9	203.175	1.29256	0.177613	7.27739	3.4e-13	1.25e-10	1.87	1.92	2.24	4.45	5.06	4.73	HES7	chr17	protein_coding	hes family bHLH transcription factor 7
ENSG00000075223.14	913.797	-0.680898	0.151502	-4.49431	6.98e-06	0.000485811	7.77	5.39	4.75	3.87	3.25	3.56	SEMA3C	chr7	protein_coding	semaphorin 3C
ENSG00000142871.18	68.7417	-0.810781	0.272025	-2.98054	0.00287741	0.0457896	0.75	0.9	0.64	0.42	0.36	0.48	CCN1	chr1	protein_coding	cellular communication network factor 1
ENSG00000089199.10	81886.3	1.43257	0.0918844	15.591	8.39e-55	3.24e-51	347	300	314.25	825.49	860.82	806.16	CHGB	chr20	protein_coding	chromogranin B
ENSG00000135899.19	69.9445	-1.17001	0.28784	-4.0648	4.81e-05	0.00235818	0.3	0.38	0.37	0.12	0.2	0.13	SP110	chr2	protein_coding	SP110 nuclear body protein
ENSG00000110841.14	977.166	-0.688645	0.145715	-4.72598	2.29e-06	0.000193365	3.7	3.14	3.13	2.32	1.5	2.13	PPFIBP1	chr12	protein_coding	PPFIA binding protein 1
ENSG00000118407.15	31.5534	-1.89089	0.413701	-4.57066	4.86e-06	0.000364685	0.23	0.17	0.13	0.04	0.04	0.06	FILIP1	chr6	protein_coding	filamin A interacting protein 1
ENSG00000078269.15	85.5577	-0.762937	0.236937	-3.22	0.00128191	0.026832	0.3	0.26	0.27	0.14	0.16	0.17	SYNJ2	chr6	protein_coding	synaptojanin 2
ENSG00000053108.17	57.0303	-1.09668	0.297113	-3.69111	0.00022328	0.00759938	0.42	0.33	0.37	0.13	0.16	0.21	FSTL4	chr5	protein_coding	follistatin like 4
