# Supplementary material for: Transcriptomics reveals the effects of NTRK1 on endoplasmic reticulum stress response-associated genes in human neuronal cell lines
Source: PeerJ. 2023 Apr 12;11:e15219. doi: 10.7717/peerj.15219 (PMC10105561; doi:10.7717/peerj.15219)
Supplement: Supplemental Information 6 [file peerj-11-15219-s006.xlsx]

## Sheet: NTRK1
Sample ID	Sample Name	Ct-NTRK1	Ct-GAPDH	Ct mean	△ct(-)	2-△ct		2-△△ct	RQ1
1	NC-1	30.9098	19.0993	19.0929	-11.8169	0.000277179	0.000288276	0.961506	1.04954
		30.5423	19.125		-11.4494	0.000357599		1.24048
		30.9323	19.0544		-11.8394	0.000272889		0.946625
2	NC-2	31.3658	19.4843	19.4606	-11.9052	0.000260717		0.904401	0.861457
		31.3293	19.447		-11.8687	0.000267402		0.927591
		31.6313	19.4504		-12.1707	0.000216893		0.752379
3	NC-3	31.6228	19.8633	19.8646	-11.7582	0.000288683		1.00141	1.08901
		31.1823	19.834		-11.3177	0.000391771		1.35901
		31.7663	19.8964		-11.9017	0.00026135		0.906596
4	NTRK1-OE-1	22.0919	19.1086	19.083	-3.00885	0.124236		430.96	398.032
		22.2037	19.054		-3.12064	0.114973		398.828
		22.3343	19.0866		-3.25124	0.105021		364.309
5	NTRK1-OE-2	22.0909	19.0626	19.142	-2.94885	0.129511		449.262	434.262
		22.1287	19.127		-2.98664	0.126163		437.647
		22.2023	19.2366		-3.06024	0.119888		415.878
6	NTRK1-OE-3	22.5539	19.6156	19.625	-2.92885	0.131319		455.533	427.788
		22.6597	19.559		-3.03464	0.122034		423.325
		22.7253	19.7006		-3.10024	0.116609		404.506

## Sheet: COL1A1
Sample ID	Sample Name	Ct-COL1A1	Ct-GAPDH	Ct mean	△ct(-)	2-△ct		2-△△ct	RQ1
1	NC-1	31.7573	18.7143	18.7252	-13.0321	0.000119388	0.00012301	0.970557	1.0518
		31.6976	18.8031		-12.9724	0.000124431		1.01155
		31.4836	18.6584		-12.7584	0.000144327		1.1733
2	NC-2	32.2133	19.0993	19.0929	-13.1204	0.000112298		0.912914	0.867287
		32.4846	19.125		-13.3917	9.30456e-05		0.756407
		32.1826	19.0544		-13.0897	0.000114712		0.93254
3	NC-3	32.4703	19.4783	19.4969	-12.9734	0.000124343		1.01084	1.08091
		32.3376	19.512		-12.8407	0.000136321		1.10821
		32.3176	19.5004		-12.8207	0.000138224		1.12368
4	NTRK1-OE-1	29.3734	19.1086	19.083	-10.2904	0.000798507		6.4914	5.9073
		29.5304	19.054		-10.4474	0.000716183		5.82215
		29.6368	19.0866		-10.5537	0.000665281		5.40835
5	NTRK1-OE-2	29.3724	19.0626	19.142	-10.2304	0.000832417		6.76707	6.44328
		29.4554	19.127		-10.3134	0.00078589		6.38883
		29.5048	19.2366		-10.3627	0.000759455		6.17393
6	NTRK1-OE-3	29.8354	19.6156	19.625	-10.2104	0.000844036		6.86153	6.3488
		29.9864	19.559		-10.3614	0.000760173		6.17976
		30.0278	19.7006		-10.4027	0.000738688		6.0051

## Sheet: CCND1
Sample ID	Sample Name	Ct-CCND1	Ct-GAPDH	Ct mean	△ct(-)	2-△ct		2-△△ct	RQ1
1	NC-1	22.8591	19.6615	19.2948	-3.56432	0.0845342	0.0887518	0.952478	1.23794
		21.994	19.38		-2.69919	0.153979		1.73494
		22.7512	18.8428		-3.45648	0.0910952		1.0264
2	NC-2	23.3151	19.4776	19.4924	-3.82264	0.0706756		0.796329	0.891526
		22.781	19.4182		-3.28851	0.102343		1.15314
		23.4502	19.5815		-3.9578	0.064355		0.725112
3	NC-3	23.5721	19.4783	19.4969	-4.07519	0.0593259		0.668447	0.870532
		22.634	19.512		-3.13706	0.113671		1.28077
		23.5852	19.5004		-4.08835	0.0587872		0.662377
4	NTRK1-OE-1	25.6172	20.1988	20.2942	-5.32302	0.024981		0.28147	0.270017
		25.729	20.6168		-5.43487	0.0231175		0.260473
		25.6874	20.0669		-5.39319	0.0237951		0.268108
5	NTRK1-OE-2	25.6162	20.097	19.7448	-5.87135	0.0170823		0.192473	0.193574
		25.654	19.6355		-5.9092	0.01664		0.187489
		25.5554	19.502		-5.81052	0.017818		0.200762
6	NTRK1-OE-3	26.0792	19.6156	19.625	-6.45414	0.0114054		0.128508	0.125503
		26.185	19.559		-6.55999	0.0105985		0.119417
		26.0784	19.7006		-6.45331	0.0114119		0.128582

## Sheet: P4HB
Sample ID	Sample Name	Ct-P4HB	Ct-GAPDH	Ct mean	△ct(-)	2-△ct		2-△△ct	RQ1
1	NC-1	25.0337	18.7143	18.7252	-6.3085	0.0126169	0.0116154	1.08622	1.04767
		25.0219	18.8031		-6.29669	0.0127206		1.09514
		25.2095	18.6584		-6.48425	0.0111698		0.961637
2	NC-2	25.4897	19.0993	19.0929	-6.39683	0.0118676		1.02171	0.868311
		25.8089	19.125		-6.71602	0.00951208		0.818916
		25.9085	19.0544		-6.81558	0.00887781		0.764311
3	NC-3	25.7467	19.4783	19.4969	-6.24983	0.0131405		1.1313	1.08402
		25.6619	19.512		-6.16502	0.0139361		1.19979
		26.0435	19.5004		-6.54658	0.0106975		0.920974
4	NTRK1-OE-1	24.8946	19.1086	19.083	-5.81159	0.0178048		1.53286	1.44365
		24.9894	19.054		-5.90637	0.0166727		1.43539
		25.0644	19.0866		-5.98133	0.0158285		1.36271
5	NTRK1-OE-2	24.8936	19.0626	19.142	-5.75159	0.0185609		1.59795	1.57622
		24.9144	19.127		-5.77237	0.0182954		1.57509
		24.9324	19.2366		-5.79033	0.0180691		1.55561
6	NTRK1-OE-3	25.3566	19.6156	19.625	-5.73159	0.01882		1.62026	1.55229
		25.4454	19.559		-5.82037	0.0176967		1.52355
		25.4554	19.7006		-5.83033	0.017575		1.51307

## Sheet: HSPA5
Sample ID	Sample Name	Ct-HSPA5	Ct-GAPDH	Ct mean	△ct(-)	2-△ct		2-△△ct	RQ1
1	NC-1	22.0336	18.7143	18.7252	-3.30839	0.100943	0.0919434	1.09788	1.04823
		22.1475	18.8031		-3.4223	0.0932791		1.01453
		22.1225	18.6584		-3.39728	0.0949112		1.03228
2	NC-2	22.4896	19.0993	19.0929	-3.39672	0.0949476		1.03268	0.870589
		22.9345	19.125		-3.84163	0.0697514		0.758634
		22.8215	19.0544		-3.72861	0.0754356		0.820457
3	NC-3	22.7466	19.4783	19.4969	-3.24972	0.105132		1.14344	1.08118
		22.7875	19.512		-3.29063	0.102193		1.11148
		22.9565	19.5004		-3.45961	0.0908978		0.988628
4	NTRK1-OE-1	21.7376	19.1086	19.083	-2.65455	0.158819		1.72735	1.73232
		21.7253	19.054		-2.64222	0.160181		1.74217
		21.7375	19.0866		-2.65449	0.158825		1.72742
5	NTRK1-OE-2	21.7366	19.0626	19.142	-2.59455	0.165563		1.80071	1.8948
		21.6503	19.127		-2.50822	0.175772		1.91174
		21.6055	19.2366		-2.46349	0.181308		1.97195
6	NTRK1-OE-3	22.1996	19.6156	19.625	-2.57455	0.167874		1.82584	1.86435
		22.1813	19.559		-2.55622	0.17002		1.84918
		22.1285	19.7006		-2.50349	0.17635		1.91803

## Sheet: THBS1
Sample ID	Sample Name	Ct-THBS1	Ct-GAPDH	Ct mean	△ct(-)	2-△ct		2-△△ct	RQ1
1	NC-1	33.5842	18.7143	18.7252	-14.859	3.36516e-05	4.0354e-05	0.83391	1.05314
		33.0169	18.8031		-14.2916	4.98638e-05		1.23566
		33.198	18.6584		-14.4728	4.39795e-05		1.08984
2	NC-2	34.0402	19.0993	19.0929	-14.9473	3.1653e-05		0.784383	0.858193
		33.8039	19.125		-14.711	3.72867e-05		0.923989
		33.897	19.0544		-14.8041	3.4955e-05		0.866208
3	NC-3	34.2972	19.4783	19.4969	-14.8003	3.50483e-05		0.86852	1.08867
		33.6569	19.512		-14.16	5.46287e-05		1.35374
		34.032	19.5004		-14.5351	4.21198e-05		1.04376
4	NTRK1-OE-1	30.0231	19.1086	19.083	-10.94	0.000509011		12.6136	12.2432
		30.0723	19.054		-10.9893	0.000491927		12.1903
		30.104	19.0866		-11.0209	0.000481249		11.9257
5	NTRK1-OE-2	30.0221	19.0626	19.142	-10.88	0.000530628		13.1493	13.38
		29.9973	19.127		-10.8553	0.000539807		13.3768
		29.972	19.2366		-10.8299	0.000549373		13.6138
6	NTRK1-OE-3	30.4851	19.6156	19.625	-10.86	0.000538034		13.3329	13.1711
		30.5283	19.559		-10.9033	0.000522142		12.939
		30.495	19.7006		-10.8699	0.00053435		13.2415

## Sheet: COL3A1
Sample ID	Sample Name	Ct-COL3A1	Ct-GAPDH	Ct mean	△ct(-)	2-△ct		2-△△ct	RQ1
1	NC-1	29.0898	19.5153	19.7377	-9.35213	0.00153013	0.00173219	0.88335	1.25892
		28.2003	19.6268		-8.46267	0.00283454		1.63639
		28.5808	20.0708		-8.84317	0.00217741		1.25702
2	NC-2	29.5458	19.994	19.8037	-9.74207	0.00116773		0.674137	0.825847
		28.9873	19.4111		-9.18361	0.00171972		0.9928
		29.2798	20.0061		-9.47612	0.00140412		0.810605
3	NC-3	29.8028	19.9783	19.9969	-9.80591	0.00111719		0.644957	0.915231
		28.8403	20.012		-8.84345	0.00217699		1.25678
		29.4148	20.0004		-9.41795	0.00146189		0.843951
4	NTRK1-OE-1	30.4585	20.4998	20.4981	-9.9604	0.00100374		0.579464	0.524061
		30.6162	20.641		-10.1181	0.000899791		0.519453
		30.7505	20.3535		-10.2525	0.00081979		0.473267
5	NTRK1-OE-2	30.8685	20.4695	20.5798	-10.2886	0.000799488		0.461547	0.514631
		30.736	20.5114		-10.1562	0.000876379		0.505936
		30.5479	20.7586		-9.96802	0.000998454		0.576411
6	NTRK1-OE-3	30.9215	20.6156	20.625	-10.2964	0.000795174		0.459057	0.40376
		31.1472	20.559		-10.5222	0.000680005		0.392569
		31.2735	20.7006		-10.6485	0.00062299		0.359654

## Sheet: XBP1
Sample ID	Sample Name	Ct-XBP1	Ct-GAPDH	Ct mean	△ct(-)	2-△ct		2-△△ct	RQ1
1	NC-1	23.7265	18.7143	18.7252	-5.00131	0.0312216	0.0292234	1.06838	1.04169
		23.7697	18.8031		-5.04445	0.030302		1.03691
		23.7937	18.6584		-5.06847	0.0298016		1.01979
2	NC-2	24.0825	18.8463	18.865	-4.98964	0.0314751		1.07705	1.05655
		24.1567	18.8801		-5.06378	0.0298986		1.02311
		24.0927	18.8684		-4.9998	0.0312544		1.0695
3	NC-3	24.1036	19.0993	19.0929	-5.23862	0.0264862		0.906335	0.901755
		24.0097	19.125		-5.1447	0.0282677		0.9673
		24.2277	19.0544		-5.36272	0.024303		0.83163
4	NTRK1-OE-1	23.7124	19.1086	19.083	-4.62941	0.0404026		1.38255	1.32066
		23.8081	19.054		-4.72508	0.0378102		1.29384
		23.8173	19.0866		-4.73429	0.0375697		1.28561
5	NTRK1-OE-2	23.7114	19.0626	19.142	-4.5694	0.0421184		1.44126	1.44287
		23.7331	19.127		-4.59108	0.0414903		1.41977
		23.6853	19.2366		-4.54329	0.0428879		1.46759
6	NTRK1-OE-3	24.2095	19.6156	19.625	-4.58442	0.0416822		1.42633	1.40903
		24.2641	19.559		-4.63908	0.0401326		1.37331
		24.2083	19.7006		-4.58329	0.0417151		1.42746
